# Supplementary material for: The relationship between autonomy, optimism, work engagement and organisational citizenship behaviour among nurses fighting COVID-19 in Wuhan: a serial multiple mediation
Source: PubMed Central journal article supplement — BMJ Open. 2020 Sep 14;10(9):e039711. doi: 10.1136/bmjopen-2020-039711 (PMC7490927; doi:10.1136/bmjopen-2020-039711), 2020-09-14
Supplement: bmjopen-2020-039711.draft_revisions.pdf [file bmjopen-2020-039711.draft_revisions.pdf]

# BMJ Open

BMJ Open is committed to open peer review. As part of this commitment we make the peer review history of every article we publish publicly available.

When an article is published we post the peer reviewers' comments and the authors' responses online. We also post the versions of the paper that were used during peer review. These are the versions that the peer review comments apply to.

The versions of the paper that follow are the versions that were submitted during the peer review process. They are not the versions of record or the final published versions. They should not be cited or distributed as the published version of this manuscript.

BMJ Open is an open access journal and the full, final, typeset and author-corrected version of record of the manuscript is available on our site with no access controls, subscription charges or pay-per-view fees (<http://bmjopen.bmj.com>).

If you have any questions on BMJ Open's open peer review process please email [info.bmjopen@bmj.com](mailto:info.bmjopen@bmj.com)

# BMJ Open

## The relationship between autonomy, optimism, work engagement, and organizational citizenship behavior among nurses fighting COVID-19 in Wuhan: A Serial Multiple Mediation

|                               |                                                                                                                                                                                                                                                                                                                                                                                                                                                                                                      |
|-------------------------------|------------------------------------------------------------------------------------------------------------------------------------------------------------------------------------------------------------------------------------------------------------------------------------------------------------------------------------------------------------------------------------------------------------------------------------------------------------------------------------------------------|
| Journal:                      | <i>BMJ Open</i>                                                                                                                                                                                                                                                                                                                                                                                                                                                                                      |
| Manuscript ID                 | bmjopen-2020-039711                                                                                                                                                                                                                                                                                                                                                                                                                                                                                  |
| Article Type:                 | Original research                                                                                                                                                                                                                                                                                                                                                                                                                                                                                    |
| Date Submitted by the Author: | 23-Apr-2020                                                                                                                                                                                                                                                                                                                                                                                                                                                                                          |
| Complete List of Authors:     | zhang, hui<br>Zhao, Yi ; The Third People's Hospital of Hubei Province<br>Zou, Ping; Nipissing University,<br>Liu, Yang; Wuhan Jinyintan Hospital<br>Lin, Shuanghong; Third People's Hospital of Hubei Province<br>Ye, Zhihong; Zhejiang University School of Medicine Sir Run Run Shaw Hospital,<br>Tang, Leiwen<br>Shao, Jing; Zhejiang University School of Medicine Sir Run Run Shaw Hospital Jiangshan Branch<br>Chen, Dandan; Zhejiang University School of Medicine Sir Run Run Shaw Hospital |
| Keywords:                     | Health policy < HEALTH SERVICES ADMINISTRATION & MANAGEMENT, Organisation of health services < HEALTH SERVICES ADMINISTRATION & MANAGEMENT, Human resource management < HEALTH SERVICES ADMINISTRATION & MANAGEMENT                                                                                                                                                                                                                                                                                  |
|                               |                                                                                                                                                                                                                                                                                                                                                                                                                                                                                                      |

SCHOLARONE™  
Manuscripts

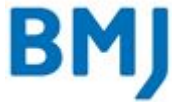

I, the Submitting Author has the right to grant and does grant on behalf of all authors of the Work (as defined in the below author licence), an exclusive licence and/or a non-exclusive licence for contributions from authors who are: i) UK Crown employees; ii) where BMJ has agreed a CC-BY licence shall apply, and/or iii) in accordance with the terms applicable for US Federal Government officers or employees acting as part of their official duties; on a worldwide, perpetual, irrevocable, royalty-free basis to BMJ Publishing Group Ltd ("BMJ") its licensees and where the relevant Journal is co-owned by BMJ to the co-owners of the Journal, to publish the Work in this journal and any other BMJ products and to exploit all rights, as set out in our [licence](#).

The Submitting Author accepts and understands that any supply made under these terms is made by BMJ to the Submitting Author unless you are acting as an employee on behalf of your employer or a postgraduate student of an affiliated institution which is paying any applicable article publishing charge ("APC") for Open Access articles. Where the Submitting Author wishes to make the Work available on an Open Access basis (and intends to pay the relevant APC), the terms of reuse of such Open Access shall be governed by a Creative Commons licence – details of these licences and which [Creative Commons](#) licence will apply to this Work are set out in our licence referred to above.

Other than as permitted in any relevant BMJ Author's Self Archiving Policies, I confirm this Work has not been accepted for publication elsewhere, is not being considered for publication elsewhere and does not duplicate material already published. I confirm all authors consent to publication of this Work and authorise the granting of this licence.

1  
2  
3  
4  
5 **The relationship between autonomy, optimism, work engagement, and**  
6  
7  
8 **organizational citizenship behavior among nurses fighting COVID-19 in**  
9  
10  
11 **Wuhan: A Serial Multiple Mediation**  
12

13 Authors' information

14  
15  
16 **Hui Zhang**, Department of cardiology, Guizhou Provincial People's Hospital, Guiyang, China;

17  
18 **Yi Zhao\*\***, Department of nursing, The Third People's Hospital of Hubei Province, Wuhan,  
19  
20 China;

21  
22  
23 **Ping Zou**, School of Nursing, Nipissing University, Toronto, Ontario, Canada;

24  
25 **Yang Liu**, Wuhan Jinyintan Hospital, Wuhan, China;

26  
27 **Shuanghong Lin** Department of nursing, Third People's Hospital of Hubei Province, Wuhan,  
28  
29 China;

30  
31  
32 **(Correspondence Author) Zhihong Ye** Sir Run Run Shaw Hospital, School of Medicine,  
33  
34 Zhejiang University, Zhejiang, China; **Email Address: ; 3192005@zju.edu.cn**  
35

36  
37 **Leiwen Tang** Sir Run Run Shaw Hospital, School of Medicine, Zhejiang University, Zhejiang,  
38  
39 China;

40  
41 **Jing Shao** Sir Run Run Shaw Hospital, School of Medicine, Zhejiang University, Zhejiang,  
42  
43 China;

44  
45  
46 **Dandan Chen** Sir Run Run Shaw Hospital, School of Medicine, Zhejiang University, Zhejiang,  
47  
48 China;

49  
50 **\*\* Co-first author**  
51  
52  
53  
54

## Abstract

Objectives: High levels of organizational citizenship behavior can enable nurses to cooperate with co-workers effectively to provide a high quality of nursing care during the outbreak of COVID-19. However, the association between autonomy, optimism, work engagement, and organizational citizenship behavior remains largely unexplored. This study aimed to test if the effect of autonomy on organizational citizenship behavior through mediating effect of optimism and work engagement.

Study design: This was a cross-sectional study.

Setting: The study was conducted in the Wuhan jinyingtang hospitals in China.

Participants: In total, 242 nurses who came across China to work in Wuhan Jinyintan hospital during the COVID-19 epidemic participated in this study.

Methods: A serial mediation model (model 6) of PROCESS macro was adapted to test the hypotheses, and a 95% confidence interval for the indirect effects was constructed by using Bootstrapping.

Results: The autonomy–organizational citizenship behavior relationship was mediated by optimism and work engagement, respectively. In addition, optimism and work engagement mediated this relationship serially.

Conclusions: The findings of this study may have implications for improving organizational citizenship behavior. The effects of optimism and work engagement suggest a potential mechanism of action for the autonomy-organizational citizenship behavior linkage. A

1  
2  
3  
4  
5 multi-faceted intervention targeting organizational citizenship behavior through optimism and  
6  
7 work engagement may help improve the quality of nursing care among nurses supporting  
8  
9 patients with COVID 19.  
10

11  
12 Keywords: The Job Demands-Resources model; Autonomy; Optimism; Organizational  
13  
14 citizenship behavior; Nurses; COVID-19  
15

### 16 17 **Strengths and limitations of this study**

- 18  
19 ● This is the first study to test a serial mediation model among autonomy, optimism,  
20  
21 work engagement, and organizational citizenship behavior.  
22  
23
- 24 ● The findings of this study have provided a better understanding for policy makers and  
25  
26 nursing management about improving nurses' organizational citizenship behavior.  
27  
28
- 29 ● The measures used in this study were internationally recognized and appropriately  
30  
31 standardized for the Chinese population.  
32  
33
- 34 ● The results cannot be allow to confirm the causal directionality.  
35  
36

37  
38 Word count: 3763.  
39  
40  
41  
42  
43  
44  
45  
46  
47  
48  
49  
50  
51  
52  
53  
54

## 1 Introduction

2 The coronavirus disease 2019 (COVID-19) began in Wuhan, in December 2019, and it  
3 rapidly spread in China and the globe, causing a worldwide pandemic. One of the first  
4 designated hospitals to treat the COVID-19 epidemic was the Wuhan Jinyintan Hospital. Due to  
5 Wuhan's shortage of health providers, the Chinese government mobilized qualified personnel  
6 from across China to aid local medical staff in the city to treat the health crisis <sup>1</sup>. As front line of  
7 health care providers, nurses play an important role as they spend the longest time caring for and  
8 have the most frequent interactions with patients. With a large number of nurses from across  
9 China coming to work with local medical staff in Wuhan Jinyintan Hospital, it is a necessity that  
10 they cooperate effectively with each other in order to deliver high quality medical care to  
11 patients with COVID-19. Cooperative behavior is important as it can increase the efficiency of  
12 an organization as a whole. However, some challenges and difficulties, such as diverse  
13 backgrounds, different work standards, and different level of hospital, may pose a threat to  
14 enacting cooperative behavior for nurses.

15 Organizational citizenship behavior is one type of cooperative behavior, which increases  
16 a person's tendency towards helping and sharing information, demonstrating integrity, and  
17 championing the institution <sup>2</sup>. Nurses with high levels of organizational citizenship behavior can  
18 cooperate with other medical staff effectively to deliver more efficient nursing care and increase  
19 organizational effectiveness <sup>3</sup>. Therefore, it is necessary to focus on nurses' organizational  
20 citizenship behavior during the COVID-19 epidemic in Wuhan Jinyintan Hospital.

21 Work engagement among nurses continues to attract considerable research attention due  
22 to its relationship with organizational citizenship behavior. For example, the study conducted by

1  
2  
3  
4  
5 23 Sulea et al. (2012) showed that nurses with a high level of work engagement are more likely  
6  
7 24 have organizational citizenship behaviors <sup>4</sup>. Researchers and practitioners are increasingly  
8  
9 25 recognizing that a clear understanding of antecedents for work engagement is in needed to  
10  
11 26 inform intervention efforts to maximize organizational citizenship behaviors.

12  
13  
14 27 One of the antecedents to work engagement is autonomy. Mauno et al. (2010) in their  
15  
16 28 longitudinal study demonstrated that autonomy can lead to work engagement <sup>5</sup>. Moreover,  
17  
18 29 Bargagliotti (2012) found that autonomy can positively impact work engagement among  
19  
20 30 professional nurses <sup>6</sup>. Studies also showed that optimism is positively associated with work  
21  
22 31 engagement. For example, Nordin et al. (2019) found that optimism positively related to work  
23  
24 32 engagement <sup>7</sup>. The positive relationship between optimism and work engagement could also be  
25  
26 33 found among Chinese medical professionals<sup>8</sup>.

27  
28  
29  
30 34 Although previous studies have made valuable contributions to the topic of work  
31  
32 35 engagement, the mechanism (e.g., how autonomy relates to organizational citizenship behavior)  
33  
34 36 underlying the association between optimism and work engagement remains largely unexplored.  
35  
36 37 The contributions of the present study are two-fold. First, it is the first time to examine the  
37  
38 38 association between autonomy, optimism, work engagement, and organizational citizenship  
39  
40 39 behavior, thus generating new insights on the mechanisms underlying the effect of autonomy on  
41  
42 40 organizational citizenship behavior. Second, by utilizing a nurse sample, this study can help  
43  
44 41 inform effective interventions to improve organizational citizenship behavior among nurses  
45  
46 42 caring for patients with COVID-19.

47  
48  
49  
50  
51 43  
52  
53 44  
54



## 45 **Theory and hypotheses**

46 The Job Demands-Resources (JD-R) model presents an understanding of organizational  
47 citizenship behavior within an occupational health psychiatry context. Job demands, such as  
48 workload or time pressure, can initiate a health impairment process, where emotional exhaustion  
49 can be predicted leading to job performance concerns. In contrast, job resources, such as  
50 autonomy or performance feedback, can initiate a motivational process, where work engagement  
51 can be predicted, resulting in positive employee behavior and job performance, including  
52 organizational citizenship behavior and creativity<sup>9 10</sup>.

53 Autonomy is one type of job resources, and the extent to which the job provides discretion,  
54 freedom, and independence can be reflected by autonomy<sup>11</sup>. Autonomy can help individuals  
55 maintain positive learning through an intimate knowledge of their work, and during this process,  
56 employees become engaged<sup>12</sup>. Work engagement refers to, “a positive, fulfilling, work-related  
57 state of mind that is characterized by vigor, dedication, and absorption,”<sup>13</sup>. When engaged  
58 individuals feel a high level of significance for their job, they are more likely to take pride in  
59 being assigned challenging tasks. Evidence has shown that the positive relationship between  
60 work engagement and important organizational outcomes and employee behavior<sup>14</sup>.

61 In line with the JD-R model, the relationship between autonomy and employee behavior can  
62 be mediated by work engagement, which is supported in the literature. Surveys such as that  
63 conducted by Kwon et al. (2019) have shown that work engagement plays a mediating role in the  
64 relationship between autonomy and employee behavior<sup>15</sup>. Keyko et al. (2016) found that  
65 autonomy can predict work engagement, leading to positive outcomes among professional nurses  
66<sup>16</sup>. Although extensive research has been carried out on work engagement, no single study exists

1  
2  
3  
4  
5 67 which test the mediating effect of work engagement in the relationship between autonomy and  
6  
7 68 organizational citizenship behavior. Thus, this study proposes:

9 69 **Hypothesis 1.** Work engagement will mediate the association between autonomy and  
10  
11  
12 70 organizational citizenship behavior.

13  
14 71 The aspects of the work environment were only considered in the early and revised versions of  
15  
16 72 the JD-R model. However, personal resources should be integrated into the JD-R model, as  
17  
18 73 human behavior can be explained by an interaction between personal and environmental factors  
19  
20  
21 74 based on psychological approaches<sup>17</sup>. Personal resources can be defined as, “the psychological  
22  
23 75 characteristics or aspects of the self that are generally associated with resiliency and that refer to  
24  
25 76 the ability to control and impact one’s environment successfully”<sup>17</sup>.

26  
27  
28 77 Personal resources have a similar function as job resources to improve personal growth and  
29  
30 78 development. Optimism is an example of a personal resource. Seligman (2006) suggest that  
31  
32 79 optimistic individuals consider that personal, permanent, and pervasive factors result in positive  
33  
34  
35 80 events, and negative outcomes can be interpreted in terms of temporary, external, and  
36  
37 81 situation-specific factors<sup>18</sup>. Optimistic people often view an event positively and internalize the  
38  
39 82 good aspects of their lives in the past, present, and future, thereby increasing their sense of  
40  
41  
42 83 self-esteem and morale<sup>19</sup>.

43  
44 84 Schaufeli (2017) suggested that though personal resources can be integrated and play an  
45  
46 85 important role in the JD-R model, it is unclear where they act in the model<sup>20</sup>. Schaufeli and Taris  
47  
48 86 (2014) stated that there were five places when considering personal resources in the JD-R model,  
49  
50  
51 87 and encouraged future research to collect more evidence to identify where and how personal  
52  
53 88 resources act<sup>17</sup>. One possible place for personal resources is that the relationship between job

1  
2  
3  
4  
5 89 resources and work engagement can be mediated by personal resources<sup>17</sup>. For example,  
6  
7 90 optimism plays a mediating role in the positive relationship between job resources and work  
8  
9 91 engagement, which is suggested by cross-sectional studies<sup>21 22</sup>. Additionally, in a longitudinal  
10  
11 92 study, Llorens (2007) found the association between job resources and work engagement can be  
12  
13 93 mediated by personal resources<sup>23</sup>. In line with the JD-R model and the suggested place for  
14  
15 94 optimism, optimism can be regarded as a mediator in the JD-R model. Thus, this study proposes:  
16  
17  
18 95 **Hypothesis 2.** The relationship between autonomy and organizational citizenship behavior will  
19  
20  
21 96 be serially mediated by optimism and work engagement.

## 22 23 97 **METHODS**

### 24 25 98 **Study units and participants**

26  
27  
28 99 A convenience sample was used with nurses caring for patients with COVID-19 from the  
29  
30 100 Wuhan Jinyintan Hospital, in March 2020. This study was conducted online via Wenjuanxing,  
31  
32 101 which is the Chinese professional survey website (www.sojump.com). A two-dimensional code  
33  
34 102 was sent to all potential participants, who can scan two-dimensional codes having access to the  
35  
36 103 questionnaires through WeChat.

37  
38  
39 104 After obtaining agreement from head nurses, research team sent the two-dimensional  
40  
41 105 code of the electronic questionnaire to head nurses through Wechat. The head nurses then  
42  
43 106 assisted with recruitment by sending the two-dimensional code to their nurses through Wechat.  
44  
45 107 The first page of electronic questionnaire provided information about this study and information  
46  
47 108 to allow participants to provide informed consent. Participation was voluntary and participants  
48  
49 109 decided on an individualized basis whether to take part in this study. The first page of electronic  
50  
51 110 questionnaire also told participants that all data would be protected and the survey was

1  
2  
3  
4  
5 111 anonymous. A total of 305 nurses were invited and 242 nurses agreed to participate and  
6  
7 112 completed the electronic questionnaire.  
8

## 9 113 **Measures**

### 11 114 **Autonomy**

13  
14 115 The autonomy subscale of the Job Diagnostic Survey was used to measure autonomy <sup>24</sup>. It  
15  
16 116 comprises three items, and the Chinese version of this scale is widely used <sup>11</sup>. One example of an  
17  
18 117 item on the questionnaire is: “My job gives me the chance to use my personal initiative and  
19  
20 118 judgement in carrying out the work” <sup>24</sup>. A seven-point scale ranging from “very little” to “very  
21  
22 119 much” was rated by participants.  
23  
24

### 25 120 **Optimism**

26  
27  
28 121 Optimism was assessed with a subscale of the Life Orientation Test <sup>25</sup>. The subscale  
29  
30 122 comprised four items, and the Chinese version of this scale was used in this study <sup>26</sup>. One sample  
31  
32 123 item in the short scale was, “In uncertain times, I usually expect the best”. A five-point scale  
33  
34 124 ranging from “strongly disagree” to “strongly agree” was rated by participants.  
35  
36

### 37 125 **Work engagement**

38  
39 126 Work engagement was measured with the Utrecht Work Engagement Scale-9 <sup>27</sup>. There are  
40  
41 127 three dimensions in this scale: three items for vigor, three items for dedication, and three items  
42  
43 128 for absorption. This scale has been widely used in China <sup>28</sup>. The items are “to my job, I feel  
44  
45 129 strong and vigorous”, and “in the morning, I feel like going to work”. A seven-point scale  
46  
47 130 ranging from “never” to “always” was rated by participants.  
48  
49

50  
51 131

### 52 53 132 **Organizational citizenship behavior**

1  
2  
3  
4  
5 133 Organizational citizenship behavior was measured with organizational citizenship behavior  
6  
7 134 scale <sup>29</sup>. There are two dimensions and ten items in this scale: seven items for helping and three  
8  
9 135 items for civic virtue. Examples of the items are “attend and actively participate in team  
10  
11 136 meetings” and “willingly share expertise with other members of the unit”. A five-point scale  
12  
13  
14 137 ranging from “completely not true” to “completely true” was rated by participants.  
15

### 16 138 **Statistical analysis**

17  
18  
19 139 This study used IBM® SPSS® Statistics, (Version 24, IBM Corporation, New York, NY) to  
20  
21 140 calculate descriptive information and correlation matrix. A serial mediation model (model 6) of  
22  
23 141 PROCESS macro was adapted to test the hypotheses <sup>30</sup>. Bootstrapping is used in the mediation  
24  
25 142 analysis, because it is a non-parametric resampling technique involving random and repeated  
26  
27 143 sub-sampling of data, and it does not need to satisfy the assumption of normally distributed data  
28  
29 144 <sup>30</sup>. A 95% confidence interval for the indirect effects is constructed by using Bootstrapping. If  
30  
31 145 the 95% confidence interval does not contain zero, it is considered to be significant for the  
32  
33 146 indirect effects. In this study, the mediating results were based on 5,000 bootstrap samples.  
34  
35

36  
37 147 A total effect, direct effect, and a total indirect effect can be provided in a serial mediation  
38  
39 148 model. For a serial mediation model with two mediators (e.g., optimism and work engagement),  
40  
41 149 there are three specific indirect effects, and the specific indirect effects can be compared. Control  
42  
43 150 variables should be included in studies when there are theoretically based justifications rather  
44  
45 151 than previous empirical relationships <sup>31</sup>. Therefore, control variables were not included in this  
46  
47 152 study.  
48  
49

## 50 153 **Results**

### 51 154 **Preliminary analyses**

Table 1 presents means, standard deviations, the Cronbach's  $\alpha$ , average variance extracted (AVE), and correlations of study variables. AVE for autonomy, optimism, work engagement, and organizational citizenship behavior was 0.71, 0.67, 0.50, and 0.63, respectively, which indicated that convergent validity was acceptable. The square of root of AVE values exceeded the construct correlation values suggesting that discriminant validity is satisfactory.

Table 1: Correlation coefficient, mean, standard deviation, and AVE

| Variables  | M    | SD   | The Cronbach's $\alpha$ | AVE  | 1           | 2           | 3           | 4           |
|------------|------|------|-------------------------|------|-------------|-------------|-------------|-------------|
| 1 Autonomy | 5.56 | 1.27 | 0.89                    | 0.71 | <b>0.84</b> |             |             |             |
| 2 Optimism | 4.17 | 0.70 | 0.87                    | 0.67 | 0.36**      | <b>0.82</b> |             |             |
| 3 WE       | 4.83 | 1.01 | 0.92                    | 0.50 | 0.49**      | 0.54**      | <b>0.71</b> |             |
| 4 OCB      | 5.01 | 0.78 | 0.95                    | 0.63 | 0.35**      | 0.47**      | 0.60**      | <b>0.79</b> |

Note: \*\*Significant at the 0.01 level; the square of root of AVE values are bolded; WE: work engagement; OCB: organizational citizenship behavior; AVE: average variance extracted.

### Mediation analyses

Model 6 of the PROCESS macro was adapted to test if the association between autonomy and organizational citizenship behavior can be mediated serially by optimism and work engagement. The results are presented in Figure 1 and Table 2. The results of serial mediation analyses showed that a total effect of autonomy on organizational citizenship behavior was found to be significant ( $c = 0.21$ ,  $SE = 0.04$ ,  $t = 5.71$ ,  $p < 0.001$ ). The direct effect of autonomy on organizational citizenship behavior was not significant when optimism and work

1  
2  
3  
4  
5 172 engagement served as mediators ( $c'=0.03$ ,  $SE = 0.04$ ,  $t = 0.72$ ,  $p= 0.47$ ). The total indirect effect  
6  
7 173 of autonomy on organizational citizenship behavior was found to be significant ( $ab=0.19$ ,  
8  
9 174  $SE=0.03$ ,  $CI=0.13$  to  $0.26$ ). The indirect effect of autonomy on organizational citizenship  
10  
11 175 behavior via optimism was significant ( $a_1b_1=0.04$ ,  $SE=0.02$ ,  $CI=0.01$  to  $0.09$ ). The indirect effect  
12  
13 176 of autonomy on organizational citizenship behavior via work engagement was also significant  
14  
15 177 ( $a_2b_2=0.10$ ,  $SE=0.02$ ,  $CI=0.06$  to  $0.15$ ). The indirect effect of autonomy on organizational  
16  
17 178 citizenship behavior was also found to be significant through both optimism and work  
18  
19 179 engagement ( $a_1a_3 b_2=0.04$ ,  $SE=0.01$ ,  $CI=0.02$  to  $0.07$ ).

20  
21  
22  
23 180 All specific indirect effects were contrasted to determine whether one indirect effect is  
24  
25 181 different than another (Table 2). Only one pair of contrasting findings were found to be  
26  
27 182 statistically significant (effect  $=0.06$ ,  $SE=0.02$ ,  $CI=0.01$  to  $0.11$ ). The results showed that the  
28  
29 183 indirect effect was larger through work engagement only than the path through both optimism  
30  
31 184 and work engagement.

32  
33  
34  
35 185 Figure 1. should be inserted here.

36  
37 186 Table 2: Serial mediation analyses

| Effect                                                                             | b     | se   | BootLLCI | BootULCI |
|------------------------------------------------------------------------------------|-------|------|----------|----------|
| <i>ab</i>                                                                          | 0.19  | 0.03 | 0.13     | 0.26     |
| <i>a<sub>1</sub> b<sub>1</sub></i>                                                 | 0.04  | 0.02 | 0.01     | 0.09     |
| <i>a<sub>2</sub> b<sub>2</sub></i>                                                 | 0.10  | 0.02 | 0.06     | 0.15     |
| <i>a<sub>1</sub> a<sub>3</sub> b<sub>2</sub></i>                                   | 0.04  | 0.01 | 0.02     | 0.07     |
| Contrasts                                                                          |       |      |          |          |
| <i>a<sub>1</sub> b<sub>1</sub> minus a<sub>2</sub> b<sub>2</sub></i>               | -0.06 | 0.03 | -0.13    | 0.01     |
| <i>a<sub>1</sub> b<sub>1</sub> minus a<sub>1</sub> a<sub>3</sub> b<sub>2</sub></i> | 0     | 0.02 | -0.04    | 0.04     |

|                               |      |      |      |      |
|-------------------------------|------|------|------|------|
| $a_2 b_2$ minus $a_1 a_3 b_2$ | 0.06 | 0.02 | 0.01 | 0.11 |
|-------------------------------|------|------|------|------|

187 Note. Bootstrap sample size = 5,000. a and b represent unstandardized regression coefficients:

188  $a_1$ = direct effect of autonomy on optimism;  $a_2$  =direct effect of autonomy on work engagement;

189  $a_3$ =direct effect of optimism on work engagement;  $b_1$ =direct effect of optimism on organizational

190 citizenship behavior;  $b_2$ =direct effect of work engagement on organizational citizenship

191 behavior;  $ab$ =total indirect effect;  $a_1 b_1$  =specific indirect effect through optimism;  $a_2 b_2$  =specific

192 indirect effect through work engagement;  $a_1 a_3 b_1$  =specific indirect effect through optimism and

193 work engagement; ULCI = Upper Limit of Confidence Interval, LLCI = Lower Limit of

194 Confidence Interval.

195

## 196 Discussion

197 The present study contributes to integrate personal resources (e.g., optimism) as a

198 mediator into the JD-R model. Through the sample of nurses in the study, it was found that

199 autonomy was associated with organizational citizenship behavior through the following

200 mechanisms: (i) indirectly through work engagement; (ii) indirectly through both optimism and

201 work engagement; and, (iii) indirectly through optimism. This means that three specific indirect

202 effects were found to be significant.

203 The findings suggest that a high level of autonomy was associated with a higher level of

204 work engagement, and thus was associated with greater organizational citizenship behavior. This

205 is consistent with earlier research, which showed that the relationship between job resources and

206 performance was mediated work engagement<sup>32</sup>. Similarly, in a study among nurses, Maurits et

207 al. (2015) found that work engagement served as a mediator in the relationship between



1  
2  
3  
4  
5 208 autonomy and intention to leave the health care sector<sup>33</sup>. In a motivational process described by  
6  
7 209 JD-R model, the indirect effect of job resources on employee behavior can be mediated by work  
8  
9 210 engagement<sup>17</sup>. When independence and freedom of a job were given to nurses, they will work in  
10  
11 211 a positive affective-motivational state, which can help generate attitudes and behaviors that lead  
12  
13  
14 212 to achieve goals. In turn, nurses are more likely to have beneficial voluntarily behaviors at work,  
15  
16 213 such as organizational citizenship behavior.

17  
18 214 Despite the mediating role of optimism having been studied in the past, understanding of  
19  
20 215 its connection to work engagement and employee behavior is still unclear. Early research shows  
21  
22 216 that the relationship between job resources and motivation can be mediated by optimism<sup>34</sup>.  
23  
24 217 Xanthopoulou et al., (2011) found that the relationship between day-level coaching and work  
25  
26 218 engagement was mediated by optimism. However, this study suggested that an indirect effect of  
27  
28 219 autonomy on organizational citizenship behavior among nurses through both optimism and work  
29  
30 220 engagement. This serial mediation model has been demonstrated for the first time between these  
31  
32 221 variables. Hobfoll (1989) proposes that resources intend to accumulate, which means that if  
33  
34 222 employees work in an environment with rich resource, they are more likely to become optimistic  
35  
36 223 and confident about career development<sup>35</sup>. These personal resources can be positively related to  
37  
38 224 work engagement. Work engagement can not only enable employees to be goal-oriented and  
39  
40 225 focus on their work tasks, but also provide the energy and enthusiasm to perform well. In other  
41  
42 226 words, the mediating effect of personal resources suggests that existing resources can accumulate  
43  
44 227 further resources, which are beneficial to job performance and employee behavior.

45  
46 228 Interestingly, the findings also suggest that the relationship between autonomy and  
47  
48 229 organizational citizenship behavior is mediated by optimism, which is not proposed in JD-R

1  
2  
3  
4  
5 230 model. However, this result was consistent with previous studies. For example, Le et al. (2018)  
6  
7 231 suggested that the relationship between job resources and employee behavior was mediated by  
8  
9 232 optimism <sup>36</sup>. Similarly, optimism has also been found to have a mediating effect on the  
10  
11 233 relationship between job resources (e.g., salesperson knowledge) and salesperson performance <sup>37</sup>.  
12  
13  
14 234 The reason may be that autonomy as a job resource gives nurses authority to choose task  
15  
16 235 distribution, work pace, work skills, and collaborators <sup>38</sup>. Therefore, nurses can use a resource  
17  
18 236 rich working environment as an instrument to activate optimism, allowing them to have the  
19  
20 237 ability to control their working environment and become confident, thus contributing to excellent  
21  
22 238 job performance <sup>35</sup>.

23  
24  
25 239 In this study, three mediation models were significant. However, comparing specific  
26  
27 240 indirect effects of mediators, the findings indicated that the indirect effect was larger through  
28  
29 241 work engagement only than the path through both optimism and work engagement. Meanwhile,  
30  
31 242 effect sizes for optimism as mediator were small in the single mediator path and serial-multiple  
32  
33 243 mediation, which limits practical significance of data. Therefore, the mediated capabilities of  
34  
35 244 optimism should not be overestimated. Additionally, the other possible places for personal  
36  
37 245 resources should be taken account. For example, Schaufeli (2017) suggested that the relation  
38  
39 246 between job characteristics and wellbeing(e.g., work engagement) can be moderated by personal  
40  
41 247 resources <sup>20</sup>.

## 42 248 **Implications**

43  
44  
45  
46  
47 249 Since optimism and work engagement are significant mediators in the autonomy-  
48  
49 250 organizational citizenship behavior linkage, a wide range of interventions should be adopted to  
50  
51 251 improve optimism and work engagement among nurses fighting COVID-19. First, it is necessary

1  
2  
3  
4  
5 252 for nursing management to boost nurses' awareness of the underlying optimism by highlighting  
6  
7 253 the concept of goals, as it allows nurses to set goals that were frustrated in the past and then  
8  
9 254 design strategies to accept challenge and achieve goals<sup>39</sup>. For instance, Zhang et al. (2014) found  
10  
11 255 that individuals can be taught about setting goals and developing measures to achieve them when  
12  
13  
14 256 facing adversity, thus leading to a forward-thinking, positive person<sup>40</sup>. The findings also suggest  
15  
16 257 that it is important for hospital administrators to focusing on improving work engagement. They  
17  
18 258 should make an effort to provide an interesting and challenging work environment with  
19  
20  
21 259 sufficient job resources fitting nurses' role expectations. Moreover, supportive management also  
22  
23 260 plays a vital role, as it provides a positive climate containing more job resources and endurable  
24  
25  
26 261 job demands for nurses, resulting in a higher level of work engagement<sup>13</sup>.

## 262 **Limitations**

263       When these finding were interpreted, some limitations should be considered. First, because  
264  
265 it is was a cross-sectional study, the results cannot be interpreted with causal directionality.  
266  
267 Longitudinal or experimental designs are encouraged to confirm the causal directionality.  
268  
269 Second, common method variance may be a potential issue due to self-report questionnaires  
270  
271 when interpreting the results. However, Harmon's single-factor test was performed, and the  
272  
273 results revealed that the explained variance of the first factor was below 50%. Additionally, four  
274  
275 factors had an eigenvalue greater than 1.0. Therefore, common-method bias may not be a major  
276  
277 issue in our study. Third, other types of personal resources, like self-efficacy, may also mediat  
278  
279 the relationship between autonomy and organizational citizenship behavior, so future studies are  
280  
281 encouraged to adopt the different types of personal resources in this association. Lastly, the  
282  
283 purposes of the study was tested among nurses came across china working in Wuhan Jinyintan

1  
2  
3  
4  
5 274 hospital fighting COVID-19 epidemic, so the results should not be generalized in other samples.  
6  
7 275 However, as the COVID-19 epidemic has spread worldwide, nurses in other countries may also  
8  
9 276 work temporarily with new colleagues to deliver treatment to patients with COVID-19. The  
10  
11 277 findings of this study have provided a better understanding for policy makers and nursing  
12  
13  
14 278 management about improving nurses' organizational citizenship behavior.  
15

## 16 279 **Conclusion**

17  
18  
19 280 Our framework aligns with the call (Schaufeli, 2017) to clarify the role of personal  
20  
21 281 resources in the JD-R model<sup>20</sup>. In a sample of nurses who came from across China to work in  
22  
23 282 Wuhan Jinyintan hospital during the COVID-19 epidemic, it was found that the relationship  
24  
25 283 between autonomy and organizational citizenship behavior is influenced by the sequential effects  
26  
27 284 of optimism and work engagement. A high level of organizational citizenship behavior can  
28  
29 285 enable nurses to cooperate with other medical staff effectively to provide high quality of nursing  
30  
31 286 care in this globe health emergency. Although future studies should focus on substantiating and  
32  
33 287 improving the findings when considering the association between these important variables,  
34  
35 288 nursing management and hospital administration should consider a multi-faceted approach to  
36  
37 289 enhance optimism and work engagement among nurses fighting COVID-19.  
38  
39  
40

## 41 290 **Acknowledgements**

42  
43  
44 291 The first author wants to thank Mr. Liangyuan Li, who gave her tremendous assistance.  
45

## 46 292 **Authors contributions**

47  
48  
49 293 HZ, YZ, and ZHY designed the study. HZ, SDL, DDC, PZ, and YZ analyzed the data, and  
50  
51 294 drafted the manuscript and interpreted the data. HZ, LWT, JS, ZHY, LY and PZ revised the  
52  
53 295 manuscript. YZ and LY participated in the data collection. All authors read and approved the  
54

1  
2  
3  
4  
5 296 final manuscript.

6  
7 297 **Funding statement**

8  
9 298 Not applicable.

10  
11  
12 299 **Competing interests**

13  
14 300 The authors declare that they have no competing interests.

15  
16 301 **Patient consent for publication**

17  
18  
19 302 Not required.

20  
21  
22 303 **Ethics approval and consent to participate**

23  
24 304 Ethical approval was obtained from ethics committee of the third People's Hospital of Hubei

25  
26  
27 305 Province. The study was performed in accordance with the ethical principles set forth in Helsinki

28  
29 306 declaration. Informed consent was obtained from all participants.

30  
31 307 **Data availability statement**

32  
33  
34 308 The datasets used and analyzed during the current study are available from the corresponding

35  
36  
37 309 author on reasonable request.

38  
39  
40 310

41  
42  
43  
44 **References**

45  
46  
47 311 1. <http://www.nhc.gov.cn/xcs/s3578/202001/2d96f6f4f0e64e6f8613abfeea3ca40.shtml>.

48 312 2. Organ DW, Podsakoff PM, MacKenzie SB. Organizational citizenship behavior: Its nature, antecedents,  
49 313 and consequences: Sage Publications 2005.

50  
51 314 3. Kazemipour F, Mohamad Amin S, Pourseidi B. Relationship between workplace spirituality and  
52 315 organizational citizenship behavior among nurses through mediation of affective organizational

- 1  
2  
3  
4  
5 316 commitment. *Journal of Nursing Scholarship* 2012;44(3):302-10.
- 6 317 4. Sulea C, Virga D, Maricutoiu LP, et al. Work engagement as mediator between job characteristics and  
7 318 positive and negative extra-role behaviors. *Career Development International* 2012;17(3):188-207.
- 8 319 5. Mauno S, Kinnunen U, Ruokolainen M. Job demands and resources as antecedents of work  
9 320 engagement: A longitudinal study. *Journal of vocational behavior* 2007;70(1):149-71.
- 10 321 6. Bargagliotti AL. Work engagement in nursing: a concept analysis. *Journal of advanced nursing*  
11 322 2012;68(6):1414-28.
- 12 323 7. Nordin NA, Rashid YKA, Panatik SA, et al. Relationship between Psychological Capital and Work  
13 324 Engagement. *Journal of Research in Psychology* 2019;1(4):6-12.
- 14 325 8. Wang X, Liu L, Zou F, et al. Associations of occupational stressors, perceived organizational support,  
15 326 and psychological capital with work engagement among Chinese female nurses. *BioMed*  
16 327 *research international* 2017;2017
- 17 328 9. Bakker AB, Demerouti E. The job demands-resources model: State of the art. *Journal of managerial*  
18 329 *psychology* 2007;22:309-28.
- 19 330 10. Demerouti E, Bakker AB, Nachreiner F, et al. The job demands-resource model of burnout. *Journal of*  
20 331 *Applied Psychology* 2001;86(3):499-512.
- 21 332 11. Liu C, Spector PE, Shi L. Cross-national job stress: a quantitative and qualitative study. *Journal of*  
22 333 *Organizational Behavior* 2007;28(2):209-39.
- 23 334 12. Bakker AB, Demerouti E. Multiple levels in job demands-resources theory: Implications for employee  
24 335 well-being and performance. *Handbook of well-being* 2018
- 25 336 13. Bakker AB. Strategic and proactive approaches to work engagement. *Organizational Dynamics*  
26 337 2017;46(2):67-75.
- 27 338 14. Bakker AB, Demerouti E. Job demands-resources theory: taking stock and looking forward. *Journal*  
28 339 *of occupational health psychology* 2017;22(3):273.
- 29 340 15. Kwon K, Kim T. An integrative literature review of employee engagement and innovative behavior:  
30 341 Revisiting the JD-R model. *Human Resource Management Review* 2020;30(2):100704.
- 31 342 16. Keyko K, Cummings GG, Yonge O, et al. Work engagement in professional nursing practice: A  
32 343 systematic review. *International Journal of Nursing Studies* 2016;61:142-64.
- 33 344 17. Schaufeli WB, Taris TW. A critical review of the job demands-resources model: Implications for  
34 345 improving work and health. *Bridging occupational, organizational and public health*: Springer  
35 346 2014:43-68.
- 36 347 18. Seligman ME. *Learned optimism: How to change your mind and your life*: Vintage 2006.
- 37 348 19. Luthans F, Youssef CM. Human, social, and now positive psychological capital management:  
38 349 Investing in people for competitive advantage. *Organizational Dynamics* 2004(33):143-60. doi:

- 1  
2  
3  
4  
5 350 <http://dx.doi.org/10.1016/j.orgdyn.2004.01.003>  
6  
7 351 20. Schaufeli W. The Job Demands-Resources model: A 'how to' guide to increase work engagement and  
8 352 prevent burnout. *Organizational Dynamics* 2017;46:120-32. doi:  
9 353 <https://doi.org/10.1016/j.orgdyn.2017.04.008>  
10  
11 354 21. Xanthopoulou D, Bakker AB, Demerouti E, et al. The role of personal resources in the job  
12 355 demands-resources model. *International journal of stress management* 2007;14(2):121.  
13  
14 356 22. Corso de Zúñiga S, Moreno-Jiménez B, Garrosa E, et al. Personal resources and personal  
15 357 vulnerability factors at work: An application of the Job Demands-Resources model among  
16 358 teachers at private schools in Peru. *Current Psychology* 2020;39(1):325-36.  
17  
18 359 23. Llorens S, Schaufeli W, Bakker A, et al. Does a positive gain spiral of resources, efficacy beliefs and  
19 360 engagement exist? *Computers in human behavior* 2007;23(1):825-41.  
20  
21 361 24. Richard HJ, Oldham G. Motivation through the design of work: Test of a theory. *Organizational*  
22 362 *behavior human performance* 1976;16(2):250-79.  
23  
24 363 25. Scheier MF, Carver CS, Bridges MW. Distinguishing Optimism From Neuroticism (and Trait Anxiety,  
25 364 Self-Mastery, and Self-Esteem): A Reevaluation of the Life Orientation Test. *Journal of*  
26 365 *Personality Social Psychology* 1995;67(6):1063-78.  
27  
28 366 26. Wen J, Xue F. Dispositional Optimism, Explanatory Style and Subjective Well-being: A Correlation  
29 367 Research in College Students *Psychological Research* 2011;5  
30  
31 368 27. Schaufeli WB, Bakker AB, Salanova M. The measurement of work engagement with a short  
32 369 questionnaire: A cross-national study. *Educational psychological measurement*  
33 370 2006;66(4):701-16.  
34  
35 371 28. Dong X, Lu H, Wang L, et al. The effects of job characteristics, organizational justice, and work  
36 372 engagement on nursing care quality in China: A mediated effects analysis. *Journal of Nursing*  
37 373 *Management* 2020  
38  
39 374 29. Bachrach DG, Wang H, Bendoly E, et al. Importance of organizational citizenship behaviour for  
40 375 overall performance evaluation: Comparing the role of task interdependence in China and the  
41 376 USA. *Management Organization Review* 2007;3(2):255-76.  
42  
43 377 30. Hayes AF. Introduction to mediation, moderation, and conditional process analysis. *Journal of*  
44 378 *Educational Measurement* 2013;51(3):335-37.  
45  
46 379 31. Bernerth JB, Aguinis H. A critical review and best-practice recommendations for control variable  
47 380 usage. *Personnel Psychology* 2016;69(1):229-83.  
48  
49 381 32. Menguc B, Auh S, Fisher M, et al. To be Engaged or Not to be Engaged: The Antecedents and  
50 382 Consequences of Service Employee Engagement. *Journal of Business Research*  
51 383 2013;66(11):2163-70.  
52  
53  
54  
55  
56  
57  
58  
59  
60

- 1  
2  
3  
4  
5 384 33. Maurits EE, de Veer AJ, van der Hoek LS, et al. Autonomous home-care nursing staff are more  
6 385 engaged in their work and less likely to consider leaving the healthcare sector: A questionnaire  
7 386 survey. *International journal of nursing studies* 2015;52(12):1816-23.  
8 387  
9 387 34. Huang J, Wang Y, You X. The Job Demands-Resources Model and Job Burnout: The Mediating Role  
10 388 of Personal Resources. *Current Psychology* 2016;35(4):562-69.  
11 389  
12 389 35. Hobfoll SE. Conservation of resources: A new attempt at conceptualizing stress. *American*  
13 390 *psychologist* 1989;44(3):513.  
14 391  
15 391 36. Le BP, Lei H, Phouvang S, et al. Self-Efficacy and Optimism Mediate the Relationship Between  
16 392 Transformational Leadership and Knowledge Sharing. *Social Behavior & Personality: An*  
17 393 *International Journal* 2018;46(11):1833-46.  
18 394  
19 394 37. Sangtani V. Revisiting Salesperson Knowledge: The Role of Optimism. *Thriving in a New World*  
20 395 *Economy: Springer* 2016:210-13.  
21 396  
22 396 38. Karasek Jr RA. Job demands, job decision latitude, and mental strain: Implications for job redesign.  
23 397 *Administrative science quarterly* 1979:285-308.  
24 398  
25 398 39. Grover SL, Teo STT, Pick D, et al. Psychological capital as a personal resource in the JD-R model.  
26 399 *Personnel Review* 2018;47(4):968-84.  
27 400  
28 400 40. Zhang X, Li Y-L, Ma S, et al. A Structured Reading Materials-Based Intervention Program to Develop  
29 401 the Psychological Capital of Chinese Employees. *Social Behavior Personality An International*  
30 402 *Journal* 2014;42(3):503-15.  
31  
32  
33  
34  
35  
36  
37  
38  
39  
40  
41  
42  
43  
44  
45  
46  
47  
48  
49  
50  
51  
52  
53  
54  
55  
56  
57  
58  
59  
60



Figure 1. Three-path mediation model

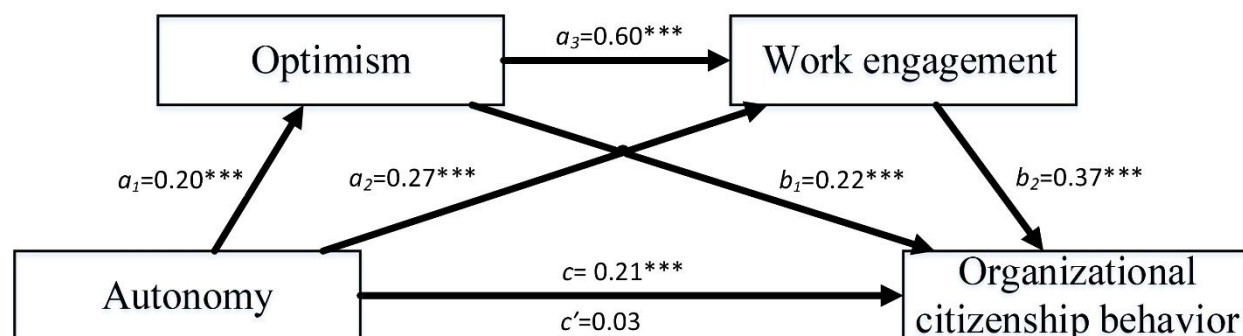

Note.  $a_1$  = direct effect of autonomy on optimism;  $a_2$  = direct effect of autonomy on work engagement;  $a_3$  = direct effect of optimism on work engagement;  $b_1$  = direct effect of optimism on organizational citizenship behavior;  $b_2$  = direct effect of work engagement on organizational citizenship behavior;  $c$  = total effect of autonomy on organizational citizenship behavior, without accounting for optimism and work engagement;  $c'$  = direct effect of autonomy on organizational citizenship behavior when accounting for optimism and work engagement. \*\*\* $p < 0.001$ .

STROBE Statement—Checklist of items that should be included in reports of *cross-sectional studies*

|                                        | Item No | Recommendation                                                                                                                                                                                                                                                                                                                                                                         |
|----------------------------------------|---------|----------------------------------------------------------------------------------------------------------------------------------------------------------------------------------------------------------------------------------------------------------------------------------------------------------------------------------------------------------------------------------------|
| <b>Title and abstract</b><br>(page1-2) | 1       | (a) Indicate the study's design with a commonly used term in the title or the abstract<br>(b) Provide in the abstract an informative and balanced summary of what was done and what was found                                                                                                                                                                                          |
| <b>Introduction</b>                    |         |                                                                                                                                                                                                                                                                                                                                                                                        |
| Background (page3-8)                   | 2       | Explain the scientific background and rationale for the investigation being reported                                                                                                                                                                                                                                                                                                   |
| Objectives (page8)                     | 3       | State specific objectives, including any prespecified hypotheses                                                                                                                                                                                                                                                                                                                       |
| <b>Methods</b>                         |         |                                                                                                                                                                                                                                                                                                                                                                                        |
| Study design (page8)                   | 4       | Present key elements of study design early in the paper                                                                                                                                                                                                                                                                                                                                |
| Setting (page8)                        | 5       | Describe the setting, locations, and relevant dates, including periods of recruitment, exposure, follow-up, and data collection                                                                                                                                                                                                                                                        |
| Participants (page9)                   | 6       | (a) Give the eligibility criteria, and the sources and methods of selection of participants                                                                                                                                                                                                                                                                                            |
| Variables (page9)                      | 7       | Clearly define all outcomes, exposures, predictors, potential confounders, and effect modifiers. Give diagnostic criteria, if applicable                                                                                                                                                                                                                                               |
| Data sources/<br>measurement (page8)   | 8*      | For each variable of interest, give sources of data and details of methods of assessment (measurement). Describe comparability of assessment methods if there is more than one group                                                                                                                                                                                                   |
| Bias (page8)                           | 9       | Describe any efforts to address potential sources of bias                                                                                                                                                                                                                                                                                                                              |
| Study size (page8)                     | 10      | Explain how the study size was arrived at                                                                                                                                                                                                                                                                                                                                              |
| Quantitative variables (page9)         | 11      | Explain how quantitative variables were handled in the analyses. If applicable, describe which groupings were chosen and why                                                                                                                                                                                                                                                           |
| Statistical methods (page10-11)        | 12      | (a) Describe all statistical methods, including those used to control for confounding<br>(b) Describe any methods used to examine subgroups and interactions<br>(c) Explain how missing data were addressed<br>(d) If applicable, describe analytical methods taking account of sampling strategy<br>(e) Describe any sensitivity analyses                                             |
| <b>Results</b>                         |         |                                                                                                                                                                                                                                                                                                                                                                                        |
| Participants (page12)                  | 13*     | (a) Report numbers of individuals at each stage of study—eg numbers potentially eligible, examined for eligibility, confirmed eligible, included in the study, completing follow-up, and analysed<br>(b) Give reasons for non-participation at each stage<br>(c) Consider use of a flow diagram                                                                                        |
| Descriptive data (page12)              | 14*     | (a) Give characteristics of study participants (eg demographic, clinical, social) and information on exposures and potential confounders<br>(b) Indicate number of participants with missing data for each variable of interest                                                                                                                                                        |
| Outcome data (page12)                  | 15*     | Report numbers of outcome events or summary measures                                                                                                                                                                                                                                                                                                                                   |
| Main results (page13)                  | 16      | (a) Give unadjusted estimates and, if applicable, confounder-adjusted estimates and their precision (eg, 95% confidence interval). Make clear which confounders were adjusted for and why they were included<br>(b) Report category boundaries when continuous variables were categorized<br>(c) If relevant, consider translating estimates of relative risk into absolute risk for a |

|                                 |    |                                                                                                                                                                            |
|---------------------------------|----|----------------------------------------------------------------------------------------------------------------------------------------------------------------------------|
|                                 |    | meaningful time period                                                                                                                                                     |
| Other analyses<br>(page13)      | 17 | Report other analyses done—eg analyses of subgroups and interactions, and sensitivity analyses                                                                             |
| <b>Discussion</b>               |    |                                                                                                                                                                            |
| Key results<br>(page15-16)      | 18 | Summarise key results with reference to study objectives                                                                                                                   |
| Limitations<br>(page16)         | 19 | Discuss limitations of the study, taking into account sources of potential bias or imprecision. Discuss both direction and magnitude of any potential bias                 |
| Interpretation<br>(page15)      | 20 | Give a cautious overall interpretation of results considering objectives, limitations, multiplicity of analyses, results from similar studies, and other relevant evidence |
| Generalisability<br>(page15-16) | 21 | Discuss the generalisability (external validity) of the study results                                                                                                      |
| <b>Other information</b>        |    |                                                                                                                                                                            |
| Funding<br>NONE                 | 22 | Give the source of funding and the role of the funders for the present study and, if applicable, for the original study on which the present article is based              |

\*Give information separately for exposed and unexposed groups.

**Note:** An Explanation and Elaboration article discusses each checklist item and gives methodological background and published examples of transparent reporting. The STROBE checklist is best used in conjunction with this article (freely available on the Web sites of PLoS Medicine at <http://www.plosmedicine.org/>, Annals of Internal Medicine at <http://www.annals.org/>, and Epidemiology at <http://www.epidem.com/>). Information on the STROBE Initiative is available at [www.strobe-statement.org](http://www.strobe-statement.org).

# BMJ Open

## The relationship between autonomy, optimism, work engagement, and organizational citizenship behavior among nurses fighting COVID-19 in Wuhan: A Serial Multiple Mediation

|                                 |                                                                                                                                                                                                                                                                                                                                                                                                                                                                                                                                                                                                                                                                                 |
|---------------------------------|---------------------------------------------------------------------------------------------------------------------------------------------------------------------------------------------------------------------------------------------------------------------------------------------------------------------------------------------------------------------------------------------------------------------------------------------------------------------------------------------------------------------------------------------------------------------------------------------------------------------------------------------------------------------------------|
| Journal:                        | <i>BMJ Open</i>                                                                                                                                                                                                                                                                                                                                                                                                                                                                                                                                                                                                                                                                 |
| Manuscript ID                   | bmjopen-2020-039711.R1                                                                                                                                                                                                                                                                                                                                                                                                                                                                                                                                                                                                                                                          |
| Article Type:                   | Original research                                                                                                                                                                                                                                                                                                                                                                                                                                                                                                                                                                                                                                                               |
| Date Submitted by the Author:   | 25-Jul-2020                                                                                                                                                                                                                                                                                                                                                                                                                                                                                                                                                                                                                                                                     |
| Complete List of Authors:       | zhang, hui; Guizhou Provincial People's Hospital; Zhejiang University School of Medicine Sir Run Run Shaw Hospital<br>Zhao, Yi ; The Third People's Hospital of Hubei Province<br>Zou, Ping; Nipissing University,<br>Liu, Yang; Wuhan Jinyintan Hospital<br>Lin, Shuanghong; Third People's Hospital of Hubei Province<br>Ye, Zhihong; Zhejiang University School of Medicine Sir Run Run Shaw Hospital,<br>Tang, Leiwen ; Zhejiang University School of Medicine Sir Run Run Shaw Hospital<br>Shao, Jing; Zhejiang University School of Medicine Sir Run Run Shaw Hospital Jiangshan Branch<br>Chen, Dandan; Zhejiang University School of Medicine Sir Run Run Shaw Hospital |
| <b>Primary Subject Heading</b>: | Public health                                                                                                                                                                                                                                                                                                                                                                                                                                                                                                                                                                                                                                                                   |
| Secondary Subject Heading:      | Nursing, Public health, Mental health, Global health                                                                                                                                                                                                                                                                                                                                                                                                                                                                                                                                                                                                                            |
| Keywords:                       | Health policy < HEALTH SERVICES ADMINISTRATION & MANAGEMENT, Organisation of health services < HEALTH SERVICES ADMINISTRATION & MANAGEMENT, Human resource management < HEALTH SERVICES ADMINISTRATION & MANAGEMENT, COVID-19, Change management < HEALTH SERVICES ADMINISTRATION & MANAGEMENT, Health & safety < HEALTH SERVICES ADMINISTRATION & MANAGEMENT                                                                                                                                                                                                                                                                                                                   |
|                                 |                                                                                                                                                                                                                                                                                                                                                                                                                                                                                                                                                                                                                                                                                 |

SCHOLARONE™  
Manuscripts

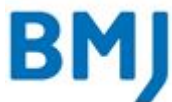

I, the Submitting Author has the right to grant and does grant on behalf of all authors of the Work (as defined in the below author licence), an exclusive licence and/or a non-exclusive licence for contributions from authors who are: i) UK Crown employees; ii) where BMJ has agreed a CC-BY licence shall apply, and/or iii) in accordance with the terms applicable for US Federal Government officers or employees acting as part of their official duties; on a worldwide, perpetual, irrevocable, royalty-free basis to BMJ Publishing Group Ltd ("BMJ") its licensees and where the relevant Journal is co-owned by BMJ to the co-owners of the Journal, to publish the Work in this journal and any other BMJ products and to exploit all rights, as set out in our [licence](#).

The Submitting Author accepts and understands that any supply made under these terms is made by BMJ to the Submitting Author unless you are acting as an employee on behalf of your employer or a postgraduate student of an affiliated institution which is paying any applicable article publishing charge ("APC") for Open Access articles. Where the Submitting Author wishes to make the Work available on an Open Access basis (and intends to pay the relevant APC), the terms of reuse of such Open Access shall be governed by a Creative Commons licence – details of these licences and which [Creative Commons](#) licence will apply to this Work are set out in our licence referred to above.

Other than as permitted in any relevant BMJ Author's Self Archiving Policies, I confirm this Work has not been accepted for publication elsewhere, is not being considered for publication elsewhere and does not duplicate material already published. I confirm all authors consent to publication of this Work and authorise the granting of this licence.

1  
2  
3  
4  
5 **The relationship between autonomy, optimism, work engagement, and**  
6  
7  
8 **organizational citizenship behavior among nurses fighting COVID-19 in**  
9  
10  
11 **Wuhan: A Serial Multiple Mediation**  
12

13 Authors' information

14  
15 **Hui Zhang<sup>1,2</sup> Yi Zhao<sup>3,\*\*</sup> Ping Zou<sup>4</sup> Yang Liu<sup>5</sup> Shuanghong Lin<sup>3</sup> Zhihong Ye<sup>2,\*</sup>**  
16  
17  
18 **Leiwen Tang<sup>2</sup> Jing Shao<sup>2</sup> Dandan Chen<sup>2</sup>**  
19  
20  
21  
22

23 <sup>1</sup> Department of cardiology, Guizhou Provincial People's Hospital, Guiyang, China;

24 <sup>2</sup> Zhejiang University School of Medicine Sir Run Run Shaw Hospital, Zhejiang, China;

25 <sup>3</sup> Department of nursing, The Third People's Hospital of Hubei Province, Wuhan, China

26 <sup>4</sup> School of Nursing, Nipissing University, Toronto, Ontario, Canada;

27 <sup>5</sup> Wuhan Jinyintan Hospital, Wuhan, China;

28  
29  
30  
31  
32  
33  
34 \*\* Co-first author

35  
36 \* Correspondence Author

37  
38  
39 Correspondence Author: Zhihong Ye Email Address: [3192005@zju.edu.cn](mailto:3192005@zju.edu.cn)  
40  
41  
42  
43  
44  
45  
46  
47  
48  
49  
50  
51  
52  
53  
54

## Abstract

Objectives: High levels of organizational citizenship behavior can enable nurses to cooperate with co-workers effectively to provide a high quality of nursing care during the outbreak of COVID-19. However, the association between autonomy, optimism, work engagement, and organizational citizenship behavior remains largely unexplored. This study aimed to test if the effect of autonomy on organizational citizenship behavior through the mediating effects of optimism and work engagement.

Study design: This was a cross-sectional study.

Setting: The study was conducted in the Wuhan jinyingtang hospitals in China.

Participants: In total, 242 nurses who came from multiple areas of China to work at the Wuhan Jinyintan hospital during the COVID-19 epidemic participated in this study.

Methods: A serial mediation model (model 6) of PROCESS macro was adapted to test the hypotheses, and a 95% confidence interval for the indirect effects was constructed by using Bootstrapping.

Results: The autonomy–organizational citizenship behavior relationship was mediated by optimism and work engagement, respectively. In addition, optimism and work engagement mediated this relationship serially.

Conclusions: The findings of this study may have implications for improving organizational citizenship behavior. The effects of optimism and work engagement suggest a potential mechanism of action for the autonomy-organizational citizenship behavior linkage. A

1  
2  
3  
4  
5 multi-faceted intervention targeting organizational citizenship behavior through optimism and  
6  
7 work engagement may help improve the quality of nursing care among nurses supporting  
8  
9 patients with COVID-19.  
10

11  
12 Keywords: The Job Demands-Resources model; Autonomy; Optimism; Organizational  
13  
14 citizenship behavior; Nurses; COVID-19  
15

### 16 **Strengths and limitations of this study**

- 17  
18  
19 ● This is the first study to test a serial mediation model among autonomy, optimism,  
20  
21 work engagement, and organizational citizenship behavior.  
22  
23
- 24 ● The findings of this study have provided a better understanding for policy makers and  
25  
26 nursing management about improving nurses' organizational citizenship behavior  
27  
28 during the outbreak of COVID-19.  
29  
30
- 31 ● The measures used in this study were internationally recognized and appropriately  
32  
33 standardized for the Chinese population.  
34  
35
- 36 ● The results cannot confirm causal directionality.  
37  
38

39  
40 Word count: 3763.  
41  
42  
43  
44  
45  
46  
47  
48  
49  
50  
51  
52  
53  
54



## 1 Introduction

2 The coronavirus disease of 2019 (COVID-19) rapidly spread across the globe causing a  
3 worldwide pandemic. In China, the Wuhan Jinyintan Hospital was the first designated hospital to  
4 treat the COVID-19 epidemic. Due to Wuhan's shortage of health providers, the Chinese  
5 government mobilized qualified personnel from across China to aid local medical staff in the city  
6 to treat the health crisis <sup>1</sup>. As front line of health care providers, nurses play an important role as  
7 they spend the longest time caring for and have the most frequent interactions with patients. With  
8 a large number of nurses from across China coming to work with local medical staff in the  
9 Wuhan Jinyintan Hospital, it is a necessity that they cooperate effectively with each other in  
10 order to deliver high quality medical care to patients with COVID-19. Cooperative behavior is  
11 important as it can increase the efficiency of an organization. However, some challenges and  
12 difficulties, such as diverse backgrounds, different work standards, and different level of original  
13 hospital, may pose a threat to enacting cooperative behavior for nurses.

14 Organizational citizenship behavior is one type of cooperative behavior, which increases  
15 a person's tendency towards helping and sharing information, demonstrating integrity, and  
16 championing the institution <sup>2</sup>. Nurses with high levels of organizational citizenship behavior can  
17 cooperate with other medical staff effectively to deliver more efficient care and increase  
18 organizational effectiveness <sup>3</sup>. Therefore, it is necessary to focus on nurses' organizational  
19 citizenship behavior during the COVID-19 epidemic in the Wuhan Jinyintan Hospital.

20 Researchers have shown an increased interest in work engagement among nurses due to  
21 its relationship with organizational citizenship behavior. For example, the study conducted by  
22 Sulea et al. (2012) showed that nurses with a high level of work engagement are more likely

1  
2  
3  
4  
5 23 have organizational citizenship behaviors <sup>4</sup>. A study in Thailand also showed that there were  
6  
7 24 positive relationships between work engagement and organizational citizenship behavior <sup>5</sup>.  
8  
9 25 Additionally, researchers and practitioners are increasingly recognizing that a clear  
10  
11 26 understanding of antecedents for work engagement is in needed to inform intervention efforts to  
12  
13  
14 27 maximize organizational citizenship behaviors. One of the antecedents to work engagement is  
15  
16 28 autonomy. Mauno et al. (2010) in their longitudinal study demonstrated that autonomy can lead  
17  
18 29 to work engagement <sup>6</sup>. Moreover, Bargagliotti (2012) found that autonomy can positively impact  
19  
20 30 work engagement among professional nurses <sup>7</sup>. Studies, such as the one by Nordin et al. (2019)  
21  
22 31 found that optimism positively related to work engagement <sup>8</sup>. The positive relationship between  
23  
24 32 optimism and work engagement was also shown in a study conducted in Korea <sup>9</sup>.  
25  
26  
27

28 33 Although previous studies have made valuable contributions to the topic about autonomy,  
29  
30 34 optimism, work engagement, and organizational citizenship behavior, the mechanism (e.g., how  
31  
32 35 autonomy relates to organizational citizenship behavior) underlying the association between  
33  
34 36 optimism and work engagement remains largely unexplored. The contributions of the present  
35  
36 37 study are two-fold. First, it is the first to examine the association between autonomy, optimism,  
37  
38 38 work engagement, and organizational citizenship behavior, thus generating new insights on the  
39  
40 39 mechanisms underlying the effect of autonomy on organizational citizenship behavior. Second,  
41  
42 40 by utilizing a sample of nurses, this study can help inform effective interventions to improve  
43  
44 41 organizational citizenship behavior among nurses caring for patients with COVID-19.  
45  
46  
47  
48  
49  
50  
51  
52  
53  
54

## 45 **Theory and hypotheses**

46 The Job Demands-Resources (JD-R) model can be used to present an understanding of  
47 organizational citizenship behavior within an occupational health psychiatry context. Job  
48 demands, such as workload or time pressure, can initiate a health impairment process, where  
49 emotional exhaustion is predicted to decrease job performance. In contrast, job resources, such as  
50 autonomy or performance feedback, can initiate a motivational process, where work engagement  
51 can be predicted, resulting in positive employee behavior and job performance, including  
52 organizational citizenship behavior and creativity<sup>10 11</sup>.

53 Autonomy is one type of job resource, and the extent to which the job provides discretion,  
54 freedom, and independence can be reflected by autonomy<sup>12</sup>. Autonomy can help individuals  
55 maintain positive learning through an intimate knowledge of their work, and during this process,  
56 employees become engaged<sup>13</sup>. Work engagement refers to, “a positive, fulfilling, work-related  
57 state of mind that is characterized by vigor, dedication, and absorption,”<sup>14</sup>. When engaged  
58 individuals feel a high level of significance of their job, they are more likely to take pride in  
59 being assigned challenging tasks performing better in the workplace<sup>15</sup>.

60 In line with the JD-R model, the relationship between autonomy and employee behavior can  
61 be mediated by work engagement. Surveys such as that conducted by Kwon et al. (2019) have  
62 shown that work engagement plays a mediating role in the relationship between autonomy and  
63 employee behavior<sup>16</sup>. Keyko et al. (2016) found that autonomy can predict work engagement,  
64 leading to positive outcomes among professional nurses<sup>17</sup>. Although extensive research has been  
65 carried out on work engagement, no single study exists which test the mediating effect of work  
66 engagement in the relationship between autonomy and organizational citizenship behavior. Thus,

1  
2  
3  
4  
5 67 this study proposes:

6  
7 68 **Hypothesis 1.** Work engagement will mediate the association between autonomy and  
8  
9 69 organizational citizenship behavior.

10  
11  
12 70 As the aspects of the work environment were only considered in the early and revised versions  
13  
14 71 of the JD-R model, recently personal resources are suggested to be integrated into the JD-R  
15  
16 72 model, due to the fact that human behavior can be explained by an interaction between personal  
17  
18 73 and environmental factors based on psychological approaches<sup>18</sup>. Personal resources is defined as  
19  
20 74 “the psychological characteristics or aspects of the self that are generally associated with  
21  
22 75 resiliency and that refer to the ability to control and impact one’s environment successfully”<sup>18</sup>.  
23  
24 76 This kind of resources have a similar function as job resources to improve personal growth and  
25  
26 77 development.

27  
28  
29  
30 78 Schaufeli (2017) suggested that though personal resources can be integrated and play an  
31  
32 79 important role in the JD-R model, it is unclear where exactly they act<sup>19</sup>. Schaufeli and Taris  
33  
34 80 (2014) stated that there were five places when considering personal resources in the JD-R model,  
35  
36 81 and encouraged future research to collect more evidence to identify where and how personal  
37  
38 82 resources act<sup>18</sup>. One possible place for personal resources is that the relationship between job  
39  
40 83 resources and work engagement can be mediated by personal resources<sup>18</sup>. Optimism is an  
41  
42 84 example of a personal resource. Seligman (2006) suggest that optimistic individuals consider that  
43  
44 85 personal, permanent, and pervasive factors result in positive events, and negative outcomes can  
45  
46 86 be interpreted in terms of temporary, external, and situation-specific factors<sup>20</sup>. Optimistic people  
47  
48 87 often view an event positively and internalize the good aspects of their lives in the past, present,  
49  
50 88 and future, thereby increasing their sense of self-esteem and morale<sup>21</sup>. Studies have shown that

1  
2  
3  
4  
5 89 optimism plays a mediating role in the positive relationship between job resources and work  
6  
7 90 engagement, which is suggested by cross-sectional studies<sup>22 23</sup>. Additionally, in a longitudinal  
8  
9 91 study, Llorens (2007) found the association between job resources and work engagement can be  
10  
11 92 mediated by personal resources(e.g., efficacy)<sup>24</sup>. However, the mediating effect of optimism on  
12  
13  
14 93 the relationship between autonomy, work engagement, and organizational citizenship has not  
15  
16 94 been investigated.

17  
18  
19 95 In line with the JD-R model and the suggested place for optimism, optimism can be regarded  
20  
21 96 as a mediator in the JD-R model. Thus, this study proposes:

22  
23 97 **Hypothesis 2.** The relationship between autonomy and organizational citizenship behavior will  
24  
25 98 be serially mediated by optimism and work engagement.

## 26 27 28 99 **METHODS**

### 29 30 100 **Study units and participants**

31  
32 101 A convenience sample was used with nurses caring for patients with COVID-19 from the  
33  
34 102 Wuhan Jinyintan Hospital, in March 2020. This study was conducted online via Wenjuanxing,  
35  
36 103 which is the Chinese professional survey website (www.sojump.com). A two-dimensional code  
37  
38 104 was sent to all potential participants, who can scan two-dimensional codes having access to the  
39  
40 105 questionnaires through WeChat.  
41  
42  
43

44 106 After obtaining agreement from head nurses, the research team sent the two-dimensional  
45  
46 107 code of the electronic questionnaire to head nurses through WeChat. The head nurses then  
47  
48 108 assisted with recruitment by sending the two-dimensional code to their nurses through WeChat.  
49  
50 109 The first page of electronic questionnaire provided information about this study and information  
51  
52 110 to allow participants to provide informed consent. Participation was voluntary and participants  
53  
54

1  
2  
3  
4  
5 111 decided on an individual basis whether to take part in this study. The first page of electronic  
6  
7 112 questionnaire also told participants that all data would be protected, and the survey was  
8  
9 113 anonymous. A total of 305 nurses were invited and 242 nurses agreed to participate and  
10  
11  
12 114 completed the electronic questionnaire.

## 14 115 **Measures**

### 16 116 **Autonomy**

18  
19 117 The autonomy subscale of the Job Diagnostic Survey was used to measure autonomy <sup>25</sup>. It  
20  
21 118 comprises three items, and the Chinese version of this scale is widely used <sup>12</sup>. One example of an  
22  
23 119 item on the questionnaire is: “My job gives me the chance to use my personal initiative and  
24  
25 120 judgement in carrying out the work” <sup>25</sup>. A seven-point scale ranging from “very little” to “very  
26  
27  
28 121 much” was rated by participants.

### 30 122 **Optimism**

32  
33 123 Optimism was assessed with a subscale of the Life Orientation Test <sup>26</sup>. The subscale  
34  
35 124 comprised four items, and the Chinese version of this scale was used in this study <sup>27</sup>. One sample  
36  
37 125 item in the short scale was, “In uncertain times, I usually expect the best”. A five-point scale  
38  
39 126 ranging from “strongly disagree” to “strongly agree” was rated by participants.

### 42 127 **Work engagement**

44  
45 128 Work engagement was measured with the Utrecht Work Engagement Scale-9 <sup>28</sup>. There are  
46  
47 129 three dimensions in this scale: three items for vigor, three items for dedication, and three items  
48  
49 130 for absorption. This scale has been widely used in China <sup>29</sup>. The items are “to my job, I feel  
50  
51 131 strong and vigorous”, and “in the morning, I feel like going to work”. A seven-point scale  
52  
53 132 ranging from “never” to “always” was rated by participants.

1  
2  
3  
4  
5 1336  
7 **134 Organizational citizenship behavior**

8  
9 135 Organizational citizenship behavior was measured with organizational citizenship behavior  
10 136 scale <sup>30</sup>. There are two dimensions and ten items in this scale: seven items for helping and three  
11  
12 137 items for civic virtue. Examples of the items are “attend and actively participate in team  
13  
14 138 meetings” and “willingly share expertise with other members of the unit”. A five-point scale  
15  
16 139 ranging from “completely not true” to “completely true” was rated by participants.  
17  
18

19  
20  
21 **140 Statistical analysis**

22  
23 141 This study used IBM® SPSS® Statistics, (Version 24, IBM Corporation, New York, NY) to  
24  
25 142 calculate descriptive information and correlation matrix. A serial mediation model (model 6) of  
26  
27 143 PROCESS macro was adapted to test the hypotheses <sup>31</sup>. Bootstrapping is used in the mediation  
28  
29 144 analysis, because it is a non-parametric resampling technique involving random and repeated  
30  
31 145 sub-sampling of data, and it does not need to satisfy the assumption of normally distributed data  
32  
33 146 <sup>31</sup>. A 95% confidence interval for the indirect effects is constructed by using Bootstrapping. If  
34  
35 147 the 95% confidence interval does not contain zero, it is considered to be significant for the  
36  
37 148 indirect effects. In this study, the mediating results were based on 5,000 bootstrap samples.  
38  
39

40  
41 149 A total effect, direct effect, and a total indirect effect can be provided in a serial mediation  
42  
43 150 model. For a serial mediation model with two mediators (e.g., optimism and work engagement),  
44  
45 151 there are three specific indirect effects, and the specific indirect effects can be compared. Control  
46  
47 152 variables should be included in studies when there are theoretically based justifications rather  
48  
49 153 than previous empirical relationships <sup>32</sup>. Therefore, control variables were not included in this  
50  
51 154 study.  
52  
53

## 155 Patient and public involvement

156 Patients and/or the public were not involved in the design, or conduct, or reporting, or  
 157 dissemination plans of this research

## 158 Results

### 159 Preliminary analyses

160 Table 1 presents means, standard deviations, the Cronbach's  $\alpha$ , average variance extracted  
 161 (AVE), and correlations of study variables. AVE for autonomy, optimism, work engagement,  
 162 and organizational citizenship behavior was 0.71, 0.67, 0.50, and 0.63, respectively, which  
 163 indicated that convergent validity was acceptable. The square of root of AVE values exceeded  
 164 the construct correlation values suggesting that discriminant validity is satisfactory.

166 Table 1: Correlation coefficient, mean, standard deviation, and AVE (N=242)

| Variables  | M    | SD   | The<br>Cronbach's<br>$\alpha$ | AVE  | 1           | 2           | 3           | 4           |
|------------|------|------|-------------------------------|------|-------------|-------------|-------------|-------------|
| 1 Autonomy | 5.56 | 1.27 | 0.89                          | 0.71 | <b>0.84</b> |             |             |             |
| 2 Optimism | 4.17 | 0.70 | 0.87                          | 0.67 | 0.36**      | <b>0.82</b> |             |             |
| 3 WE       | 4.83 | 1.01 | 0.92                          | 0.50 | 0.49**      | 0.54**      | <b>0.71</b> |             |
| 4 OCB      | 5.01 | 0.78 | 0.95                          | 0.63 | 0.35**      | 0.47**      | 0.60**      | <b>0.79</b> |

167 Note: \*\*Significant at the 0.01 level; the square of root of AVE values are bolded; WE: work  
 168 engagement; OCB: organizational citizenship behavior; AVE: average variance extracted.

### 170 Mediation analyses

171 Model 6 of the PROCESS macro was adapted to test if the association between



1  
2  
3  
4  
5 172 autonomy and organizational citizenship behavior can be mediated serially by optimism and  
6  
7 173 work engagement. The results are presented in Figure 1 and Table 2. The total indirect effect of  
8  
9 174 autonomy on organizational citizenship behavior was found to be significant ( $ab=0.19$ ,  $SE=0.03$ ,  
10  
11  
12 175  $CI=0.13$  to  $0.26$ ). The indirect effect of autonomy on organizational citizenship behavior via  
13  
14 176 optimism was significant ( $a_1b_1=0.04$ ,  $SE=0.02$ ,  $CI=0.01$  to  $0.09$ ). The indirect effect of  
15  
16 177 autonomy on organizational citizenship behavior via work engagement was also significant  
17  
18 178 ( $a_2b_2=0.10$ ,  $SE=0.02$ ,  $CI=0.06$  to  $0.15$ ). The indirect effect of autonomy on organizational  
19  
20 179 citizenship behavior was also found to be significant through both optimism and work  
21  
22 180 engagement ( $a_1a_3b_2=0.04$ ,  $SE=0.01$ ,  $CI=0.02$  to  $0.07$ ).

25  
26 181 All specific indirect effects were contrasted to determine whether one indirect effect is  
27  
28 182 different than another (Table 2). Only one pair of contrasting findings were found to be  
29  
30 183 statistically significant (effect  $=0.06$ ,  $SE=0.02$ ,  $CI=0.01$  to  $0.11$ ). The results showed that the  
31  
32 184 indirect effect was larger through work engagement only than the path through both optimism  
33  
34 185 and work engagement.

36  
37 186 Figure 1. should be inserted here.

38  
39 187 Table 2: Serial mediation analyses (N=242)

| Effect                                                             | b     | se   | BootLLCI | BootULCI |
|--------------------------------------------------------------------|-------|------|----------|----------|
| <i>ab</i>                                                          | 0.19  | 0.03 | 0.13     | 0.26     |
| <i>a<sub>1</sub>b<sub>1</sub></i>                                  | 0.04  | 0.02 | 0.01     | 0.09     |
| <i>a<sub>2</sub>b<sub>2</sub></i>                                  | 0.10  | 0.02 | 0.06     | 0.15     |
| <i>a<sub>1</sub>a<sub>3</sub>b<sub>2</sub></i>                     | 0.04  | 0.01 | 0.02     | 0.07     |
| Contrasts                                                          |       |      |          |          |
| <i>a<sub>1</sub>b<sub>1</sub> minus a<sub>2</sub>b<sub>2</sub></i> | -0.06 | 0.03 | -0.13    | 0.01     |

|                               |      |      |       |      |
|-------------------------------|------|------|-------|------|
| $a_1 b_1$ minus $a_1 a_3 b_2$ | 0    | 0.02 | -0.04 | 0.04 |
| $a_2 b_2$ minus $a_1 a_3 b_2$ | 0.06 | 0.02 | 0.01  | 0.11 |

188 Note. Bootstrap sample size = 5,000. a and b represent unstandardized regression coefficients:

189  $a_1$ = direct effect of autonomy on optimism;  $a_2$  =direct effect of autonomy on work engagement;

190  $a_3$ =direct effect of optimism on work engagement;  $b_1$ =direct effect of optimism on organizational

191 citizenship behavior;  $b_2$ =direct effect of work engagement on organizational citizenship

192 behavior;  $ab$ =total indirect effect;  $a_1 b_1$  =specific indirect effect through optimism;  $a_2 b_2$  =specific

193 indirect effect through work engagement;  $a_1 a_3 b_1$  =specific indirect effect through optimism and

194 work engagement; ULCI = Upper Limit of Confidence Interval, LLCI = Lower Limit of

195 Confidence Interval.

196

## 197 Discussion

198 The present study contributes to integrate optimism in the JD-R model as a mediator.

199 Through the sample of nurses in the study, it was found that autonomy was associated with

200 organizational citizenship behavior through the following mechanisms: (i) indirectly through

201 work engagement; (ii) indirectly through both optimism and work engagement; and, (iii)

202 indirectly through optimism. This means that three specific indirect effects were found to be

203 significant.

204 These findings suggest that a high level of autonomy was associated with a higher level

205 of work engagement, and thus was associated with greater organizational citizenship behavior.

206 This is consistent with an earlier study published from Korea, which showed that the relationship

207 between job resources and performance was mediated work engagement<sup>33</sup>. Similarly, in a study

1  
2  
3  
4  
5 208 among nurses, Maurits et al. (2015) found that work engagement served as a mediator in the  
6  
7 209 relationship between autonomy and intention to leave the health care sector<sup>34</sup>. In a motivational  
8  
9 210 process described by JD-R model, the indirect effect of job resources on employee behavior can  
10  
11 211 be mediated by work engagement<sup>18</sup>. When independence and freedom of a job were given to  
12  
13 212 nurses, they will work in a positive affective-motivational state, which can help generate  
14  
15 213 attitudes and behaviors that lead to achieve goals. In turn, nurses are more likely to have  
16  
17 214 beneficial voluntarily behaviors at work, such as organizational citizenship behavior.  
18  
19  
20

21 215         Despite the mediating role of optimism having been studied in the past, understanding of  
22  
23 216 its connection to work engagement and employee behavior is still unclear. Additionally, previous  
24  
25 217 research shows that the relationship between job resources and motivation can be mediated by  
26  
27 218 optimism<sup>35</sup>. Xanthopoulou et al., (2011) found that the relationship between day-level coaching  
28  
29 219 and work engagement was mediated by optimism. However, this study suggested that an indirect  
30  
31 220 effect of autonomy on organizational citizenship behavior among nurses occurs via both  
32  
33 221 optimism and work engagement. This serial mediation model has been demonstrated for the first  
34  
35 222 time between these variables. Hobfoll (1989) proposes that resources intend to accumulate,  
36  
37 223 which means that if employees work in an environment with rich resource, they are more likely  
38  
39 224 to become optimistic and confident about career development<sup>36</sup>. These personal resources can be  
40  
41 225 positively related to work engagement. Work engagement can not only enable employees to be  
42  
43 226 goal-oriented and focus on their work tasks, but also provide the energy and enthusiasm to  
44  
45 227 perform well. In other words, the mediating effect of personal resources suggests that existing  
46  
47 228 resources can accumulate further resources, which are beneficial to job performance and  
48  
49 229 employee behavior.  
50  
51  
52  
53  
54

1  
2  
3  
4  
5 230 Interestingly, the findings also suggest that the relationship between autonomy and  
6  
7 231 organizational citizenship behavior is mediated by optimism, which is not proposed in JD-R  
8  
9 232 model. However, this result was consistent with previous studies. For example, Le et al. (2018)  
10  
11 233 suggested that the relationship between job resources and employee behavior was mediated by  
12  
13 234 optimism<sup>37</sup>. Similarly, optimism has also been found to have a mediating effect on the  
14  
15 235 relationship between job resources (e.g., salesperson knowledge) and salesperson performance<sup>38</sup>.  
16  
17 236 The reason may be that autonomy as a job resource gives nurses authority to choose task  
18  
19 237 distribution, work pace, work skills, and collaborators<sup>39</sup>. Therefore, nurses can use a resource  
20  
21 238 rich working environment as an instrument to activate optimism, allowing them to have the  
22  
23 239 ability to control their working environment and become confident, thus contributing to excellent  
24  
25 240 job performance<sup>36</sup>.

26  
27  
28  
29  
30 241 In this study, three mediation models were significant. However, in comparing specific  
31  
32 242 indirect effects of mediators, the findings indicated that the indirect effect was larger through  
33  
34 243 work engagement only, compared to the path through both optimism and work engagement.  
35  
36 244 Meanwhile, effect sizes for optimism as mediator were small in the single mediator path and  
37  
38 245 serial-multiple mediation, which limits practical significance of data. Therefore, the mediated  
39  
40 246 capabilities of optimism should not be overestimated. Additionally, the other possible places for  
41  
42 247 personal resources should be taken account. For example, Schaufeli (2017) suggested that the  
43  
44 248 relation between job characteristics and wellbeing (e.g., work engagement) can be moderated by  
45  
46 249 personal resources<sup>19</sup>.

## 50 51 250 **Implications**

52  
53 251 Since optimism and work engagement are significant mediators in the autonomy-

1  
2  
3  
4  
5 252 organizational citizenship behavior linkage, a wide range of interventions should be adopted to  
6  
7 253 improve optimism and work engagement among nurses fighting COVID-19. First, it is necessary  
8  
9 254 for nursing management to boost nurses' awareness of the underlying optimism by highlighting  
10  
11 255 the concept of goals, as it allows nurses who were frustrated in the past, to design and implement  
12  
13 256 strategies to achieve their goals<sup>40</sup>. For instance, Zhang et al. (2014) found that individuals can  
14  
15 257 be taught about setting goals and developing measures to achieve them when facing adversity,  
16  
17 258 thus leading to a forward-thinking, positive person<sup>41</sup>. The findings of this present study also  
18  
19 259 suggest that it is important for nursing management to focusing on improving work engagement.  
20  
21 260 They should make an effort to provide an interesting and challenging work environment with  
22  
23 261 sufficient job resources fitting nurses' role expectations. Moreover, supportive management also  
24  
25 262 plays a vital role, as it provides a positive climate containing more job resources and endurable  
26  
27 263 job demands for nurses, resulting in a higher level of work engagement<sup>14</sup>. For example, a  
28  
29 264 study published from Japan has shown that psychological demands and decision latitude can  
30  
31 265 increase work engagement<sup>42</sup>.

### 37 266 **Limitations**

38  
39 267 When these finding were interpreted, some limitations should be considered. First, the  
40  
41 268 results cannot be interpreted with causal directionality as the study had a cross-sectional design.  
42  
43 269 Longitudinal or experimental designs are encouraged to confirm causal directionality. Second,  
44  
45 270 common method variance may be a potential issue due to self-report questionnaires when  
46  
47 271 interpreting the results. However, Harmon's single-factor test was performed, and the results  
48  
49 272 revealed that the explained variance of the first factor was below 50%. Additionally, four factors  
50  
51 273 had an eigenvalue greater than 1.0. Therefore, common-method bias may not be a major issue in

1  
2  
3  
4  
5 274 our study. Third, other types of personal resources, like self-efficacy, may also mediate the  
6  
7 275 relationship between autonomy and organizational citizenship behavior, so future studies are  
8  
9 276 encouraged to adopt the different types of personal resources in this association. Lastly, the  
10  
11 277 purposes of the study was tested among nurses came across china working in Wuhan Jinyintan  
12  
13 278 Hospital fighting COVID-19 epidemic, so the results may not be generalizable to other samples.  
14  
15 279 However, as the COVID-19 epidemic has spread worldwide, nurses in other countries may also  
16  
17 280 work temporarily with new colleagues to deliver treatment to patients with COVID-19. The  
18  
19 281 findings of this study have provided a better understanding for policy makers and nursing  
20  
21 282 management about improving nurses' organizational citizenship behavior.  
22  
23  
24

## 25 283 **Conclusion**

26  
27  
28 284 Our framework aligns with the call (Schaufeli, 2017) to clarify the role of personal  
29  
30 285 resources in the JD-R model <sup>19</sup>. In a sample of nurses who came from across China to work in  
31  
32 286 Wuhan Jinyintan Hospital during the COVID-19 epidemic, it was found that the relationship  
33  
34 287 between autonomy and organizational citizenship behavior is influenced by the sequential effects  
35  
36 288 of optimism and work engagement. A high level of organizational citizenship behavior can  
37  
38 289 enable nurses to cooperate with other medical staff effectively to provide high quality of nursing  
39  
40 290 care in this globe health emergency. Although future studies should focus on substantiating and  
41  
42 291 improving the findings when considering the association between these important variables,  
43  
44 292 nursing management and hospital administration should consider a multi-faceted approach to  
45  
46 293 enhance optimism and work engagement among nurses fighting COVID-19.  
47  
48  
49  
50

## 51 294 **Acknowledgements**

52  
53 295 The first author wants to thank Mr. Liangyuan Li, who provided her with tremendous assistance.  
54

1  
2  
3  
4  
5 296 **Authors contributions**

6  
7 297 HZ, YZ, and ZHY designed the study. HZ, SHL, DDC, PZ, and YZ analyzed the data, and  
8  
9 298 drafted the manuscript and interpreted the data. HZ, LWT, JS, ZHY, LY and PZ revised the  
10  
11 299 manuscript. YZ and LY participated in the data collection. All authors read and approved the  
12  
13  
14 300 final manuscript.

15  
16 301 **Funding statement**

17  
18 302 Not applicable.

19  
20  
21 303 **Competing interests**

22  
23 304 The authors declare that they have no competing interests.

24  
25 305 **Patient consent for publication**

26  
27 306 Not required.

28  
29  
30  
31 307 **Ethics approval and consent to participate**

32  
33 308 Ethical approval was obtained from ethics committee of the third People's Hospital of Hubei  
34  
35 309 Province. The study was performed in accordance with the ethical principles set forth in Helsinki  
36  
37 310 declaration. Informed consent was obtained from all participants.

38  
39 311 **Data availability statement**

40  
41 312 The datasets used and analyzed during the current study are available from the corresponding  
42  
43 313 author on reasonable request.

44  
45  
46  
47  
48  
49 314

50  
51  
52  
53 **References**

- 1  
2  
3  
4  
5 315 1. <http://www.nhc.gov.cn/xcs/s3578/202001/2d96f6f4f0e64e6f8613abfeeee3ca40.shtml>.
- 6  
7 316 2. Organ DW, Podsakoff PM, MacKenzie SB. Organizational citizenship behavior: Its nature, antecedents,  
8 317 and consequences: Sage Publications 2005.
- 9  
10 318 3. Kazemipour F, Mohamad Amin S, Pourseidi B. Relationship between workplace spirituality and  
11 319 organizational citizenship behavior among nurses through mediation of affective organizational  
12 320 commitment. *Journal of Nursing Scholarship* 2012;44(3):302-10.
- 13  
14 321 4. Sulea C, Virga D, Maricutoiu LP, et al. Work engagement as mediator between job characteristics and  
15 322 positive and negative extra-role behaviors. *Career Development International* 2012;17(3):188-207.
- 16  
17 323 5. S R, KR B. The relationship between employee engagement and organizational citizenship behaviour  
18 324 in Thailand. *Human Resource Development International* 2012;15(2):157-74.
- 19  
20 325 6. Mauno S, Kinnunen U, Ruokolainen M. Job demands and resources as antecedents of work  
21 326 engagement: A longitudinal study. *Journal of vocational behavior* 2007;70(1):149-71.
- 22  
23 327 7. Bargagliotti LA. Work engagement in nursing: a concept analysis. *Journal of advanced nursing*  
24 328 2012;68(6):1414-28. doi: 10.1111/j.1365-2648.2011.05859.x [published Online First: 2011/11/03]
- 25  
26 329 8. Nordin NA, Rashid YKA, Panatik SA, et al. Relationship between Psychological Capital and Work  
27 330 Engagement. *Journal of Research in Psychology* 2019;1(4):6-12.
- 28  
29 331 9. Joo BK, Lim DH, Kim S. Enhancing work engagement The roles of psychological capital, authentic  
30 332 leadership, and work empowerment. *Leadership Org Dev J* 2016;37(8):1117-34. doi:  
31 333 10.1108/Lodj-01-2015-0005
- 32  
33 334 10. Bakker AB, Demerouti E. The job demands-resources model: State of the art. *Journal of managerial*  
34 335 *psychology* 2007;22:309-28.
- 35  
36 336 11. Demerouti E, Bakker AB, Nachreiner F, et al. The job demands-resource model of burnout. *Journal of*  
37 337 *Applied Psychology* 2001;86(3):499-512.
- 38  
39 338 12. Liu C, Spector PE, Shi L. Cross-national job stress: a quantitative and qualitative study. *Journal of*  
40 339 *Organizational Behavior* 2007;28(2):209-39. doi: 10.1002/job.435
- 41  
42 340 13. Bakker AB, Demerouti E. Multiple levels in job demands-resources theory: Implications for employee  
43 341 well-being and performance. *Handbook of well-being* 2018
- 44  
45 342 14. Bakker AB. Strategic and proactive approaches to work engagement. *Organizational Dynamics*  
46 343 2017;46(2):67-75. doi: 10.1016/j.orgdyn.2017.04.002
- 47  
48 344 15. Bakker AB, Demerouti E. Job demands-resources theory: taking stock and looking forward. *Journal*  
49 345 *of occupational health psychology* 2017;22(3):273. doi: <http://dx.doi.org/10.1037/ocp00000>
- 50  
51 346 16. Kwon K, Kim T. An integrative literature review of employee engagement and innovative behavior:  
52 347 Revisiting the JD-R model. *Human Resource Management Review* 2020;30(2):100704.
- 53  
54 348 17. Keyko K, Cummings GG, Yonge O, et al. Work engagement in professional nursing practice: A



- 1  
2  
3  
4  
5 349 systematic review. *International Journal of Nursing Studies* 2016;61:142-64.
- 6  
7 350 18. Schaufeli WB, Taris TW. A critical review of the job demands-resources model: Implications for  
8 351 improving work and health. Bridging occupational, organizational and public health: Springer  
9 352 2014:43-68.
- 10  
11 353 19. Schaufeli WB. Applying the Job Demands-Resources model. *Organizational Dynamics*  
12 354 2017;46(2):120-32. doi: 10.1016/j.orgdyn.2017.04.008
- 13  
14 355 20. Seligman ME. *Learned optimism: How to change your mind and your life*: Vintage 2006.
- 15 356 21. Luthans F, Youssef CM. Human, social and now positive psychological capital management:  
16 357 Investing in people for competitive advantage. *Organizational Dynamics* 2004;33(2):143-60. doi:  
17 358 10.1016/j.orgdyn.2004.01.003
- 18  
19 359 22. Xanthopoulou D, Bakker AB, Demerouti E, et al. The role of personal resources in the job  
20 360 demands-resources model. *International journal of stress management* 2007;14(2):121. doi:  
21 361 <https://doi.org/10.1037/1072-5245.14.2.121>
- 22  
23 362 23. Corso de Zúñiga S, Moreno-Jiménez B, Garrosa E, et al. Personal resources and personal  
24 363 vulnerability factors at work: An application of the Job Demands-Resources model among  
25 364 teachers at private schools in Peru. *Current Psychology* 2020;39(1):325-36.
- 26  
27 365 24. Llorens S, Schaufeli W, Bakker A, et al. Does a positive gain spiral of resources, efficacy beliefs and  
28 366 engagement exist? *Computers in human behavior* 2007;23(1):825-41.
- 29  
30 367 25. Richard HJ, Oldham G. Motivation through the design of work: Test of a theory. *Organizational*  
31 368 *behavior human performance* 1976;16(2):250-79. doi: 10.1016/0030-5073(76)90016-7
- 32  
33 369 26. Scheier MF, Carver CS, Bridges MW. Distinguishing Optimism From Neuroticism (and Trait Anxiety,  
34 370 Self-Mastery, and Self-Esteem): A Reevaluation of the Life Orientation Test. *Journal of*  
35 371 *Personality Social Psychology* 1995;67(6):1063-78.
- 36  
37 372 27. Wen J, Xue F. Dispositional Optimism, Explanatory Style and Subjective Well-being: A Correlation  
38 373 Research in College Students *Psychological Research* 2011;5
- 39  
40 374 28. Schaufeli WB, Bakker AB, Salanova M. The measurement of work engagement with a short  
41 375 questionnaire - A cross-national study. *Educational and Psychological Measurement*  
42 376 2006;66(4):701-16. doi: 10.1177/0013164405282471
- 43  
44 377 29. Dong X, Lu H, Wang L, et al. The effects of job characteristics, organizational justice and work  
45 378 engagement on nursing care quality in China: A mediated effects analysis. *J Nurs Manag*  
46 379 2020;28(3):559-66. doi: 10.1111/jonm.12957 [published Online First: 2020/01/19]
- 47  
48 380 30. Bachrach DG, Wang H, Bendoly E, et al. Importance of organizational citizenship behaviour for  
49 381 overall performance evaluation: Comparing the role of task interdependence in China and the  
50 382 USA. *Management Organization Review* 2007;3(2):255-76.

- 1  
2  
3  
4  
5 383 31. Hayes AF. Introduction to mediation, moderation, and conditional process analysis. *Journal of*  
6 384 *Educational Measurement* 2013;51(3):335-37. doi: 10.1111/jedm.12050  
7  
8 385 32. Bernerth JB, Aguinis H. A critical review and best-practice recommendations for control variable  
9 386 usage. *Personnel Psychology* 2016;69(1):229-83. doi: <https://doi.org/10.1111/peps.12103>  
10  
11 387 33. Kim W. Examining Mediation Effects of Work Engagement Among Job Resources, Job Performance,  
12 388 and Turnover Intention. *Perform Improv Q* 2017;29(4):407-25. doi: 10.1002/piq.21235  
13  
14 389 34. Maurits EEM, de Veer AJE, van der Hoek LS, et al. Autonomous home-care nursing staff are more  
15 390 engaged in their work and less likely to consider leaving the healthcare sector: A questionnaire  
16 391 survey. *International Journal of Nursing Studies* 2015;52(12):1816-23. doi:  
17 392 10.1016/j.ijnurstu.2015.07.006  
18  
19 393 35. Huang J, Wang Y, You X. The Job Demands-Resources Model and Job Burnout: The Mediating Role  
20 394 of Personal Resources. *Current Psychology* 2016;35(4):562-69.  
21  
22 395 36. Hobfoll SE. Conservation of resources: A new attempt at conceptualizing stress. *American*  
23 396 *psychologist* 1989;44(3):513.  
24  
25 397 37. Le BP, Lei H, Phouvang S, et al. Self-Efficacy and Optimism Mediate the Relationship Between  
26 398 Transformational Leadership and Knowledge Sharing. *Social Behavior & Personality: An*  
27 399 *International Journal* 2018;46(11):1833-46.  
28  
29 400 38. Sangtani V. Revisiting Salesperson Knowledge: The Role of Optimism. *Thriving in a New World*  
30 401 *Economy*: Springer 2016:210-13.  
31  
32 402 39. Karasek Jr RA. Job demands, job decision latitude, and mental strain: Implications for job redesign.  
33 403 *Administrative science quarterly* 1979:285-308.  
34  
35 404 40. Grover SL, Teo STT, Pick D, et al. Psychological capital as a personal resource in the JD-R model.  
36 405 *Personnel Review* 2018;47(4):968-84. doi: 10.1108/Pr-08-2016-0213  
37  
38 406 41. Zhang X, Li Y-L, Ma S, et al. A Structured Reading Materials-Based Intervention Program to Develop  
39 407 the Psychological Capital of Chinese Employees. *Social Behavior Personality An International*  
40 408 *Journal* 2014;42(3):503-15.  
41  
42 409 42. Inoue A, Kawakami N, K , T, et al. Job demands, job resources, and work engagement of  
43 410 Japanese employees: a prospective cohort study. *International archives of occupational and*  
44 411 *environmental health* 2013;86(4):441-49.

47  
48 412 Figure 1. Three-path mediation model  
49

50  
51 413 Note.  $a_1$  = direct effect of autonomy on optimism;  $a_2$  = direct effect of autonomy on work  
52 414 engagement;  $a_3$  = direct effect of optimism on work engagement;  $b_1$  = direct effect of optimism on  
53 415 organizational citizenship behavior;  $b_2$  = direct effect of work engagement on organizational  
54

1  
2  
3  
4  
5  
6  
7  
8  
9  
10  
11  
12  
13  
14  
15  
16  
17  
18  
19  
20  
21  
22  
23  
24  
25  
26  
27  
28  
29  
30  
31  
32  
33  
34  
35  
36  
37  
38  
39  
40  
41  
42  
43  
44  
45  
46  
47  
48  
49  
50  
51  
52  
53  
54  
55  
56  
57  
58  
59  
60

416 citizenship behavior; c=total effect of autonomy on organizational citizenship behavior, without  
417 accounting for optimism and work engagement; c'=direct effect of autonomy on organizational  
418 citizenship behavior when accounting for optimism and work engagement. \*\*\*p <0.001.

For peer review only

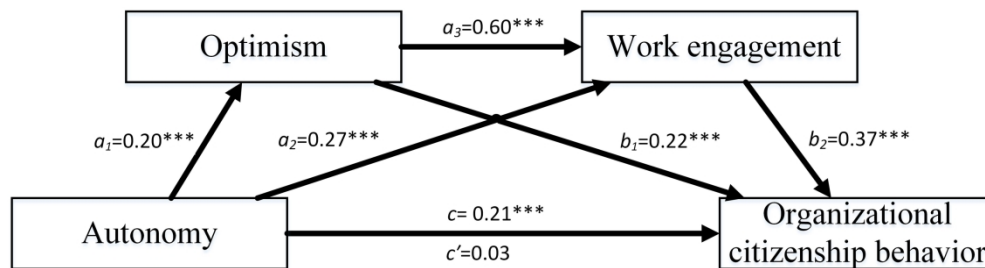

Three-path mediation model

254x72mm (300 x 300 DPI)

1  
2  
3  
4  
5  
6  
7  
8  
9  
10  
11  
12  
13  
14  
15  
16  
17  
18  
19  
20  
21  
22  
23  
24  
25  
26  
27  
28  
29  
30  
31  
32  
33  
34  
35  
36  
37  
38  
39  
40  
41  
42  
43  
44  
45  
46  
47  
48  
49  
50  
51  
52  
53  
54  
55  
56  
57  
58  
59  
60STROBE Statement—Checklist of items that should be included in reports of *cross-sectional studies*

|                                        | Item No | Recommendation                                                                                                                                                                                                                                                                                                                                                                         |
|----------------------------------------|---------|----------------------------------------------------------------------------------------------------------------------------------------------------------------------------------------------------------------------------------------------------------------------------------------------------------------------------------------------------------------------------------------|
| <b>Title and abstract</b><br>(page1-2) | 1       | (a) Indicate the study's design with a commonly used term in the title or the abstract<br>(b) Provide in the abstract an informative and balanced summary of what was done and what was found                                                                                                                                                                                          |
| <b>Introduction</b>                    |         |                                                                                                                                                                                                                                                                                                                                                                                        |
| Background (page3-8)                   | 2       | Explain the scientific background and rationale for the investigation being reported                                                                                                                                                                                                                                                                                                   |
| Objectives (page8)                     | 3       | State specific objectives, including any prespecified hypotheses                                                                                                                                                                                                                                                                                                                       |
| <b>Methods</b>                         |         |                                                                                                                                                                                                                                                                                                                                                                                        |
| Study design (page8)                   | 4       | Present key elements of study design early in the paper                                                                                                                                                                                                                                                                                                                                |
| Setting (page8)                        | 5       | Describe the setting, locations, and relevant dates, including periods of recruitment, exposure, follow-up, and data collection                                                                                                                                                                                                                                                        |
| Participants (page9)                   | 6       | (a) Give the eligibility criteria, and the sources and methods of selection of participants                                                                                                                                                                                                                                                                                            |
| Variables (page9)                      | 7       | Clearly define all outcomes, exposures, predictors, potential confounders, and effect modifiers. Give diagnostic criteria, if applicable                                                                                                                                                                                                                                               |
| Data sources/<br>measurement (page8)   | 8*      | For each variable of interest, give sources of data and details of methods of assessment (measurement). Describe comparability of assessment methods if there is more than one group                                                                                                                                                                                                   |
| Bias (page8)                           | 9       | Describe any efforts to address potential sources of bias                                                                                                                                                                                                                                                                                                                              |
| Study size (page8)                     | 10      | Explain how the study size was arrived at                                                                                                                                                                                                                                                                                                                                              |
| Quantitative variables (page9)         | 11      | Explain how quantitative variables were handled in the analyses. If applicable, describe which groupings were chosen and why                                                                                                                                                                                                                                                           |
| Statistical methods (page10-11)        | 12      | (a) Describe all statistical methods, including those used to control for confounding<br>(b) Describe any methods used to examine subgroups and interactions<br>(c) Explain how missing data were addressed<br>(d) If applicable, describe analytical methods taking account of sampling strategy<br>(e) Describe any sensitivity analyses                                             |
| <b>Results</b>                         |         |                                                                                                                                                                                                                                                                                                                                                                                        |
| Participants (page12)                  | 13*     | (a) Report numbers of individuals at each stage of study—eg numbers potentially eligible, examined for eligibility, confirmed eligible, included in the study, completing follow-up, and analysed<br>(b) Give reasons for non-participation at each stage<br>(c) Consider use of a flow diagram                                                                                        |
| Descriptive data (page12)              | 14*     | (a) Give characteristics of study participants (eg demographic, clinical, social) and information on exposures and potential confounders<br>(b) Indicate number of participants with missing data for each variable of interest                                                                                                                                                        |
| Outcome data (page12)                  | 15*     | Report numbers of outcome events or summary measures                                                                                                                                                                                                                                                                                                                                   |
| Main results (page13)                  | 16      | (a) Give unadjusted estimates and, if applicable, confounder-adjusted estimates and their precision (eg, 95% confidence interval). Make clear which confounders were adjusted for and why they were included<br>(b) Report category boundaries when continuous variables were categorized<br>(c) If relevant, consider translating estimates of relative risk into absolute risk for a |

|                                 |    |                                                                                                                                                                            |
|---------------------------------|----|----------------------------------------------------------------------------------------------------------------------------------------------------------------------------|
|                                 |    | meaningful time period                                                                                                                                                     |
| Other analyses<br>(page13)      | 17 | Report other analyses done—eg analyses of subgroups and interactions, and sensitivity analyses                                                                             |
| <b>Discussion</b>               |    |                                                                                                                                                                            |
| Key results<br>(page15-16)      | 18 | Summarise key results with reference to study objectives                                                                                                                   |
| Limitations<br>(page16)         | 19 | Discuss limitations of the study, taking into account sources of potential bias or imprecision. Discuss both direction and magnitude of any potential bias                 |
| Interpretation<br>(page15)      | 20 | Give a cautious overall interpretation of results considering objectives, limitations, multiplicity of analyses, results from similar studies, and other relevant evidence |
| Generalisability<br>(page15-16) | 21 | Discuss the generalisability (external validity) of the study results                                                                                                      |
| <b>Other information</b>        |    |                                                                                                                                                                            |
| Funding<br>NONE                 | 22 | Give the source of funding and the role of the funders for the present study and, if applicable, for the original study on which the present article is based              |

\*Give information separately for exposed and unexposed groups.

**Note:** An Explanation and Elaboration article discusses each checklist item and gives methodological background and published examples of transparent reporting. The STROBE checklist is best used in conjunction with this article (freely available on the Web sites of PLoS Medicine at <http://www.plosmedicine.org/>, Annals of Internal Medicine at <http://www.annals.org/>, and Epidemiology at <http://www.epidem.com/>). Information on the STROBE Initiative is available at [www.strobe-statement.org](http://www.strobe-statement.org).
